# Supplementary material
Source: Research Square preprint supplement (doi:10.21203/rs.3.rs-9176655/v1)
Supplement: Supplementary file 1 [file a86c24306b38de2ccae45973.docx]

**Supporting information**

**In Situ Synthesis of Mn-Doped CoP@Ni2P Nanoneedles as a High-Performance Bifunctional Electrocatalyst for Efficient Water Splitting**

Yu Dong1, Xuan Zhao1, Zhijie Wang1, Ende Wang2, Yusheng Qiu1, Naikun Sun1 *, Yongli Tong1 *

**Supplementary Figures and Tables**


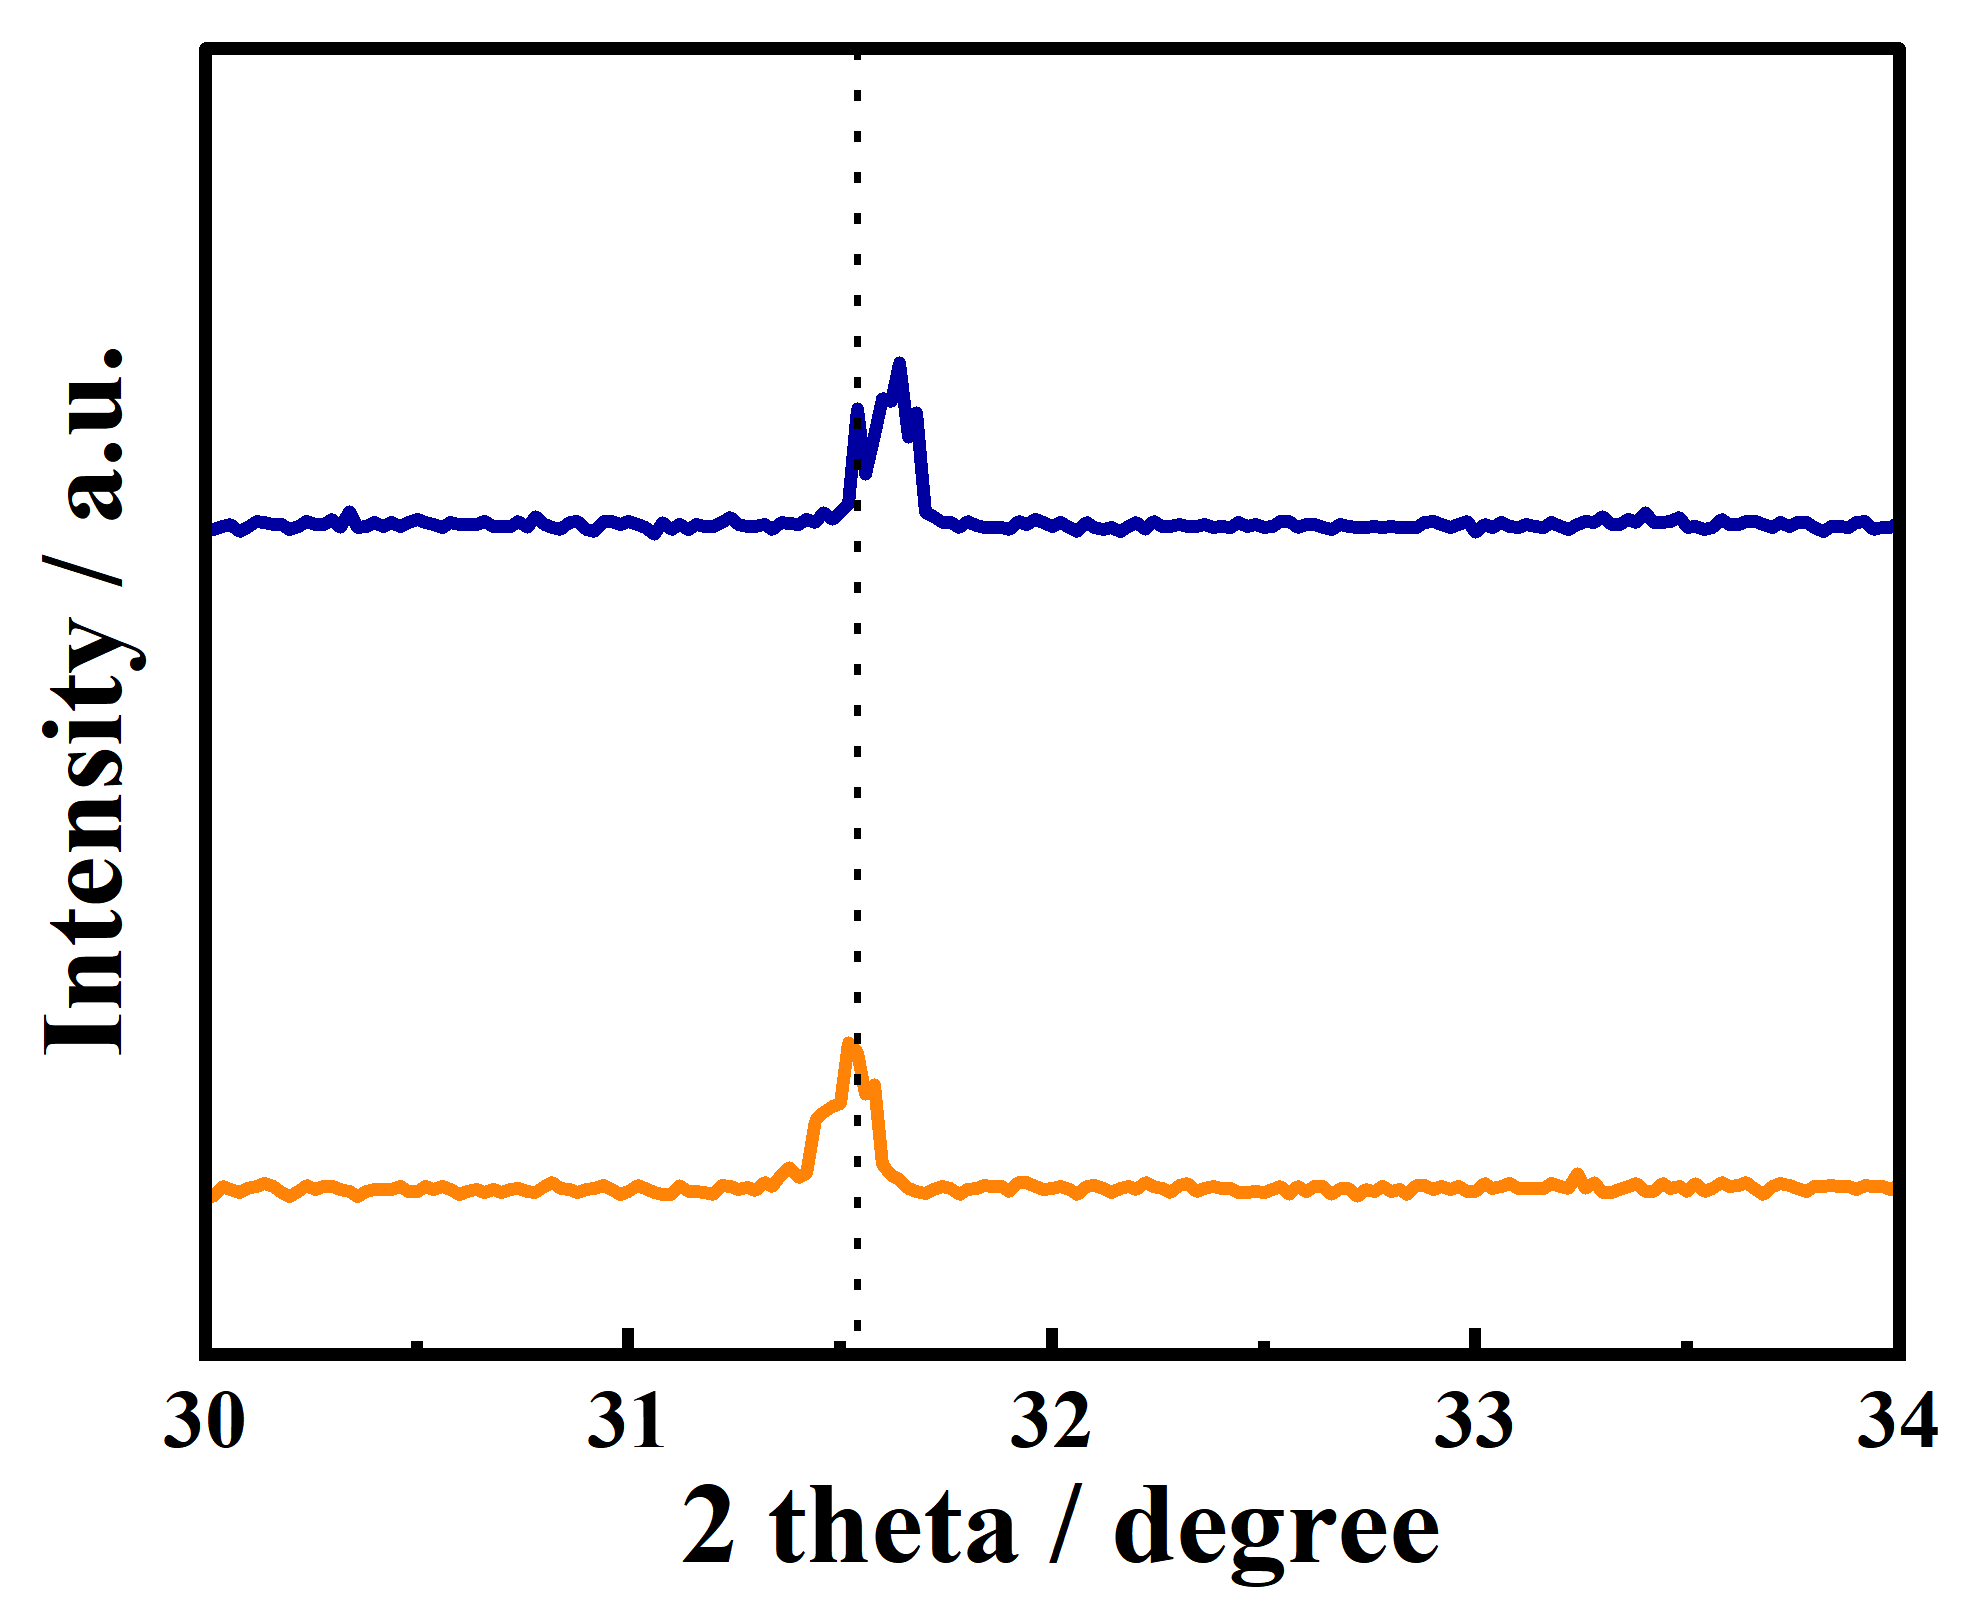

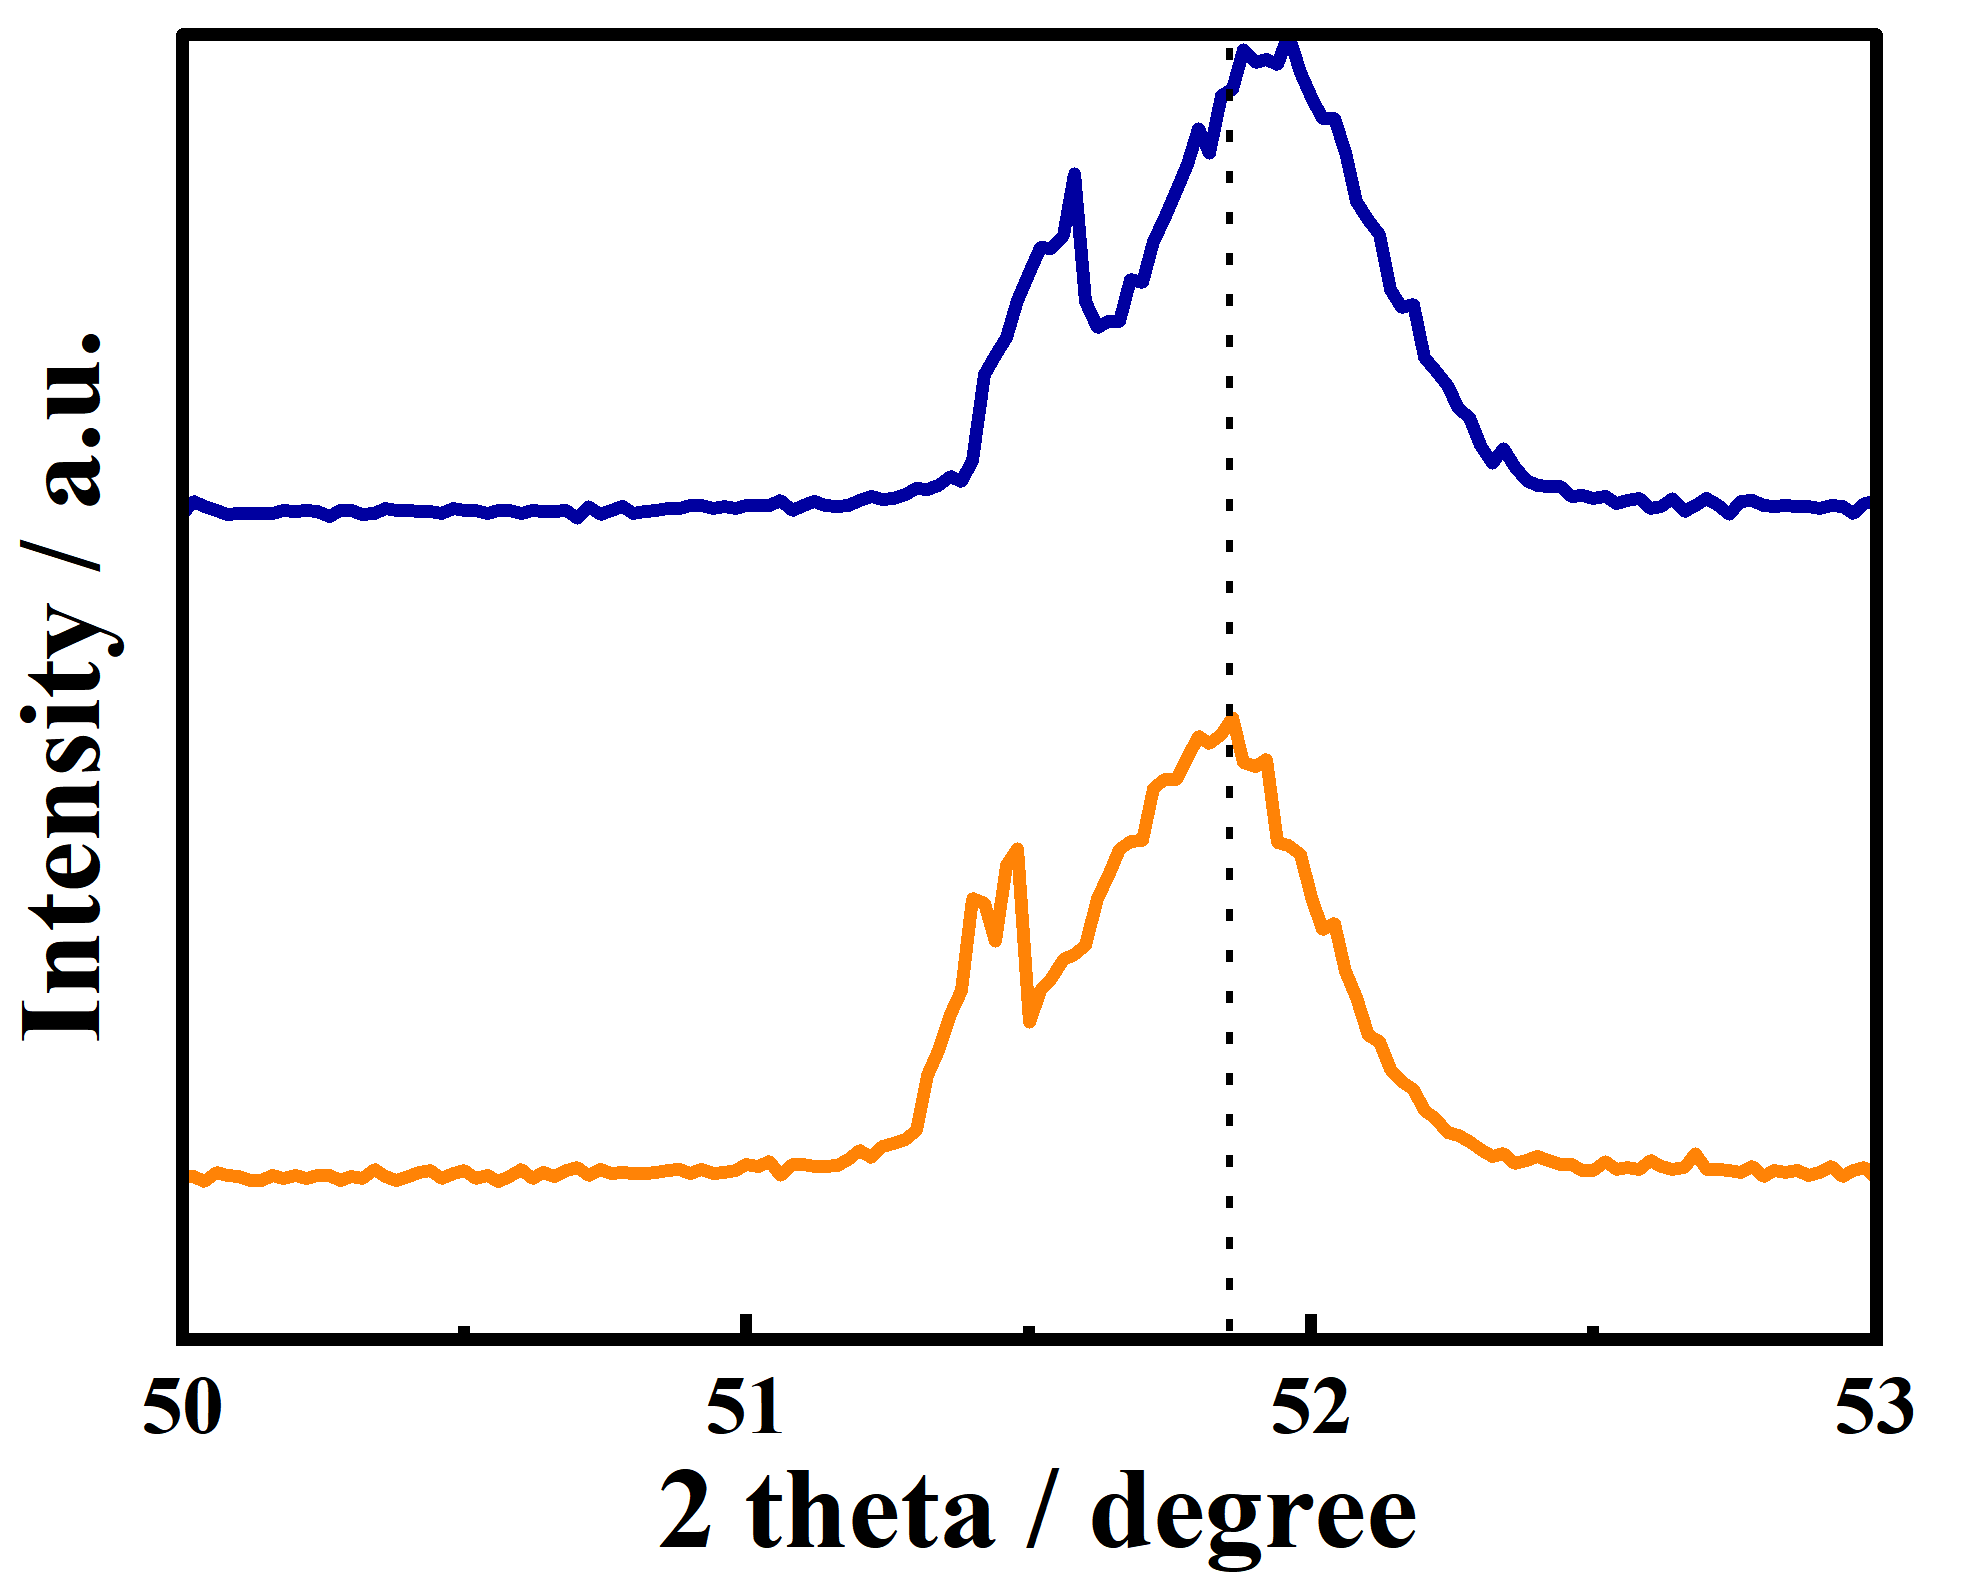


**Figure S1** Local XRD magnified diffraction pattern


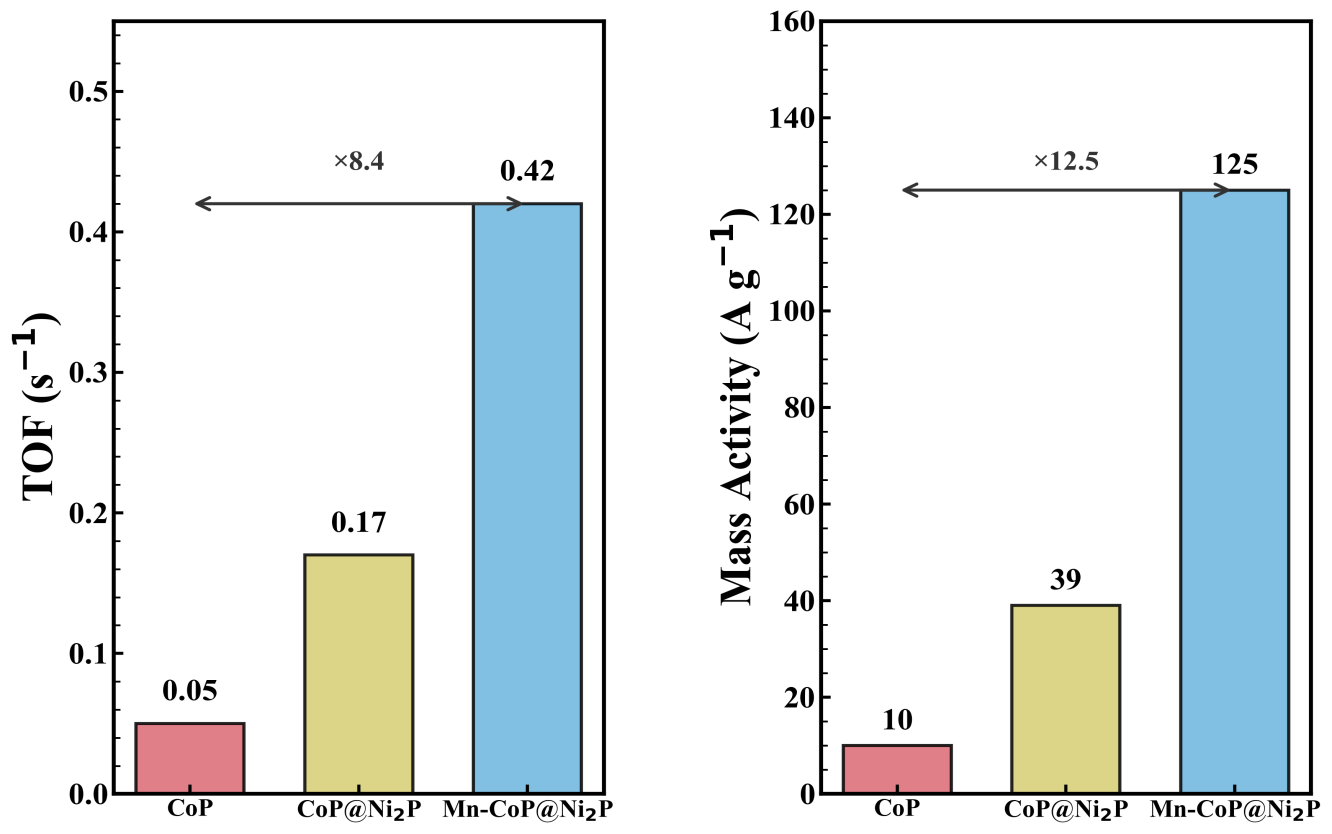


**(b)**

**(a)**

**Figure S2**. （a) TOF comparison of CoP, CoP@Ni2P and Mn-CoP@Ni2P. (b) Mass activity comparison.

**(d)**

**(c)**

**(b)**

**(a)**


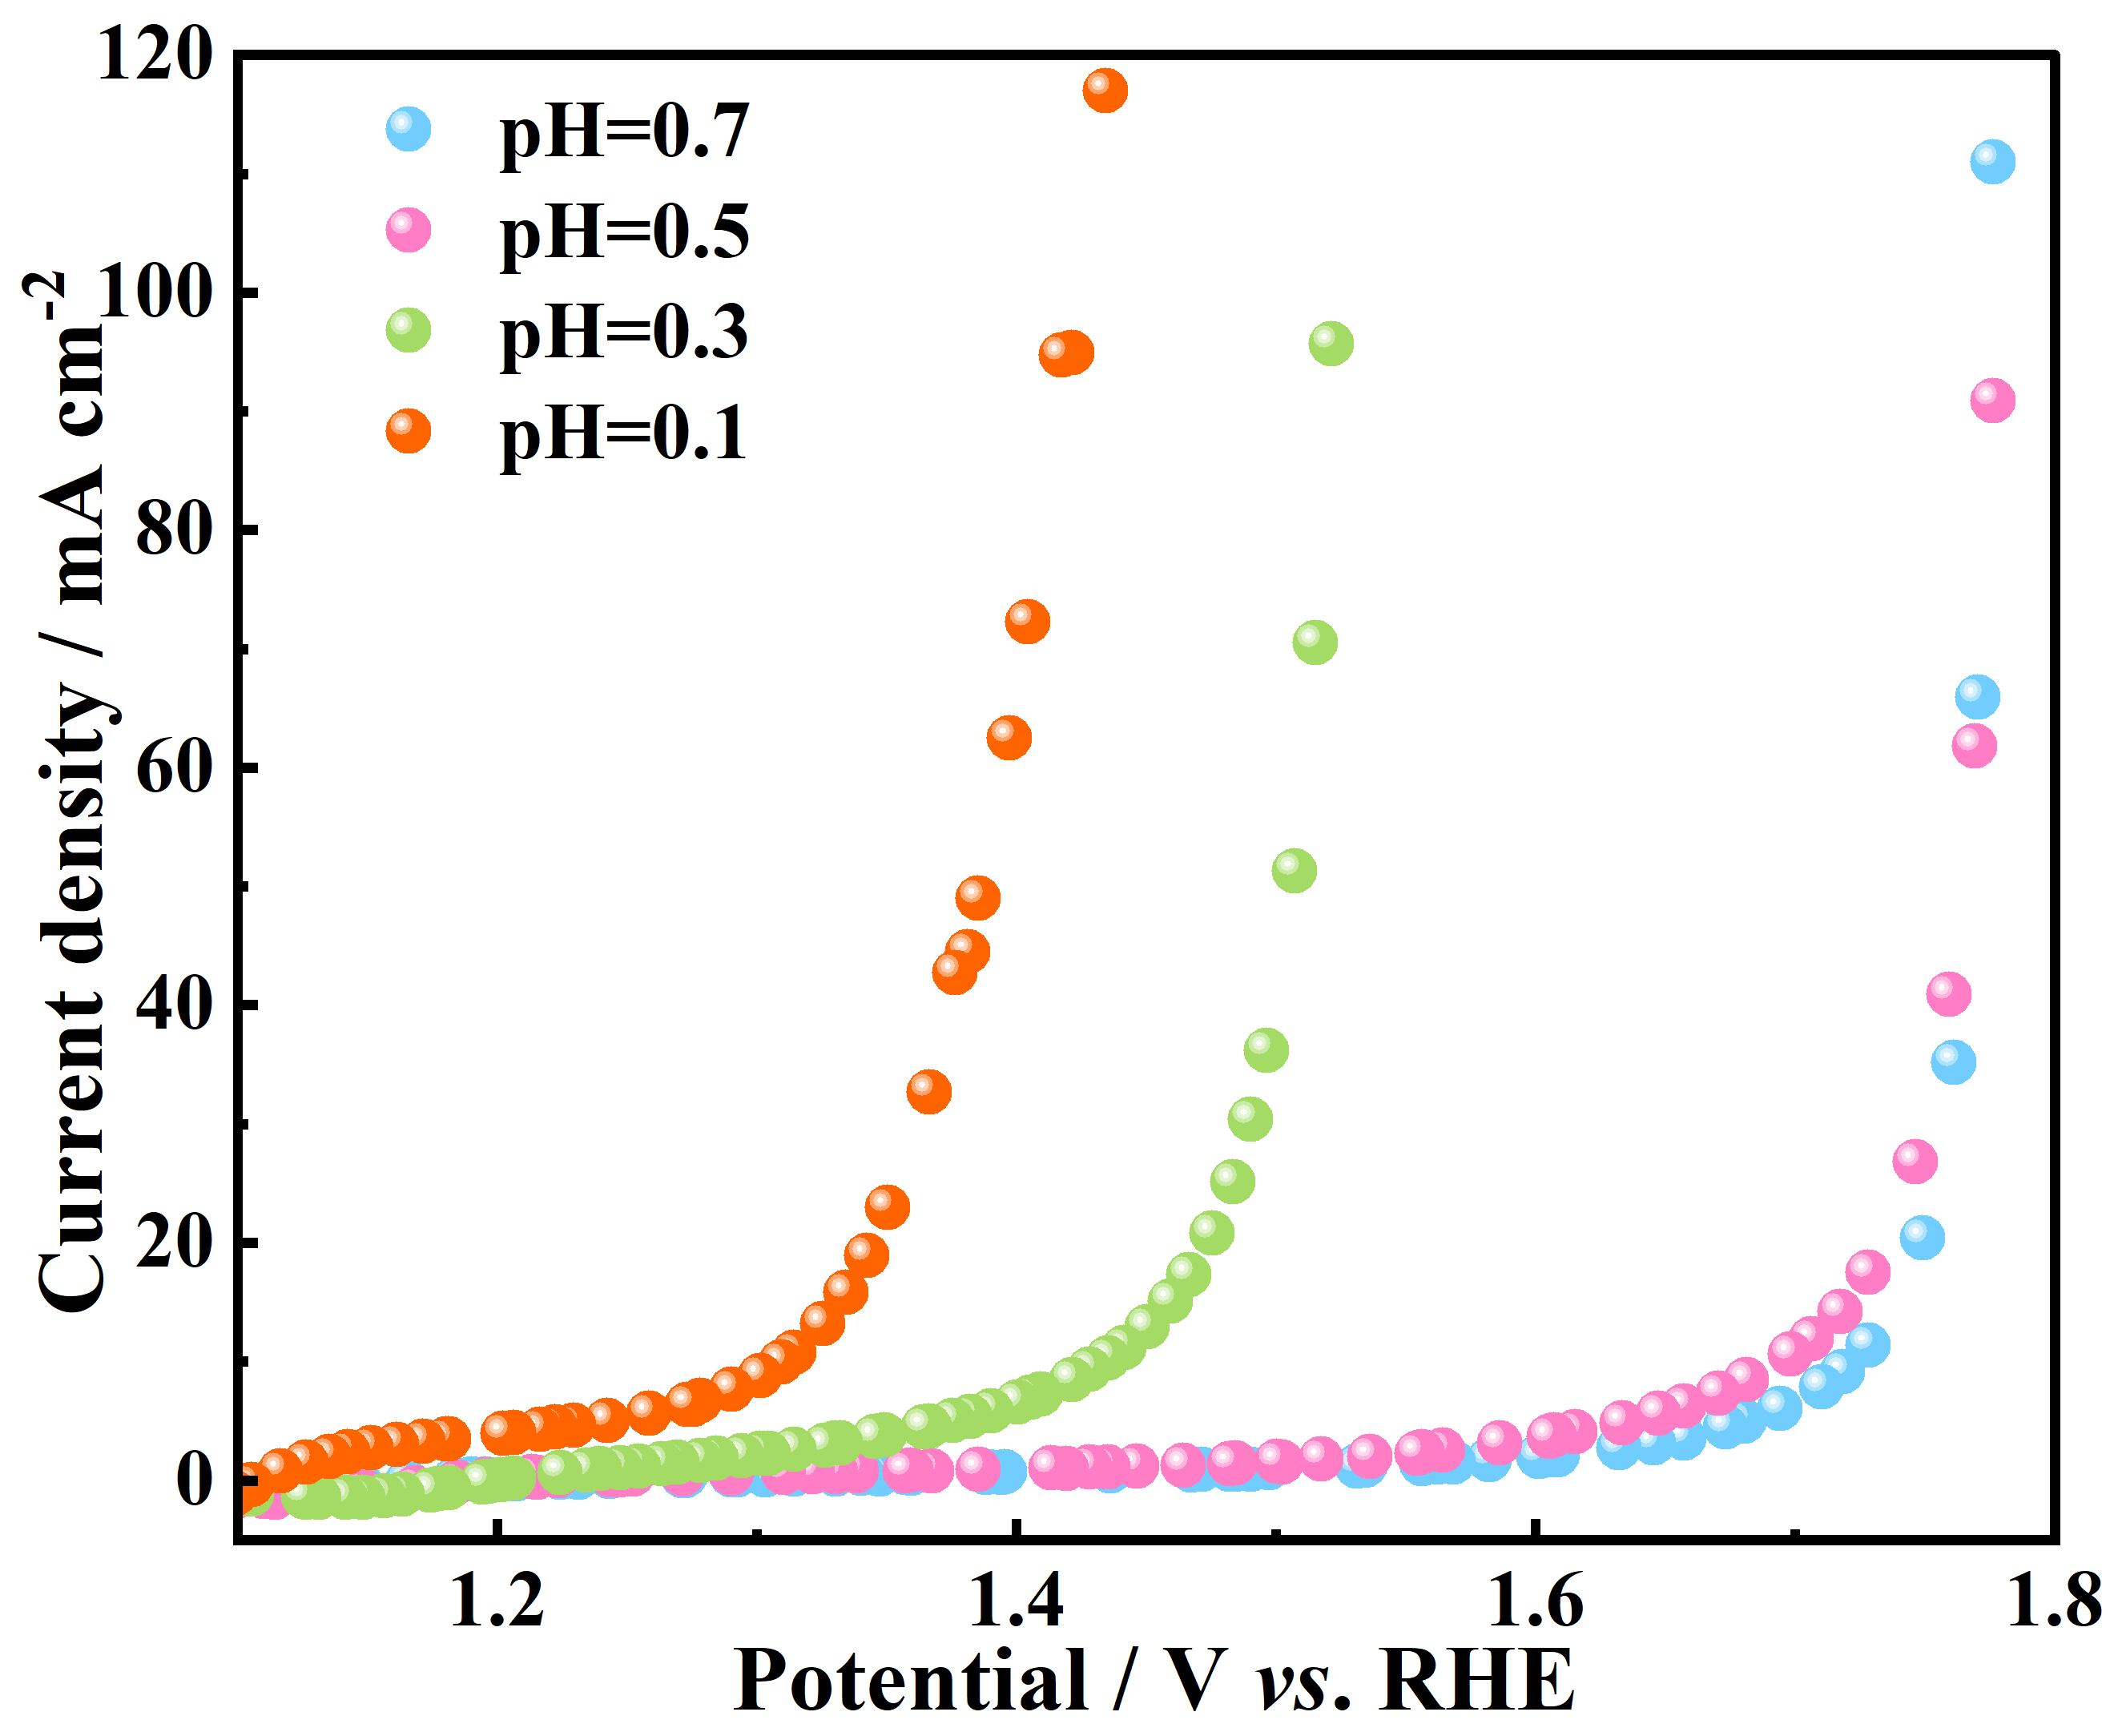

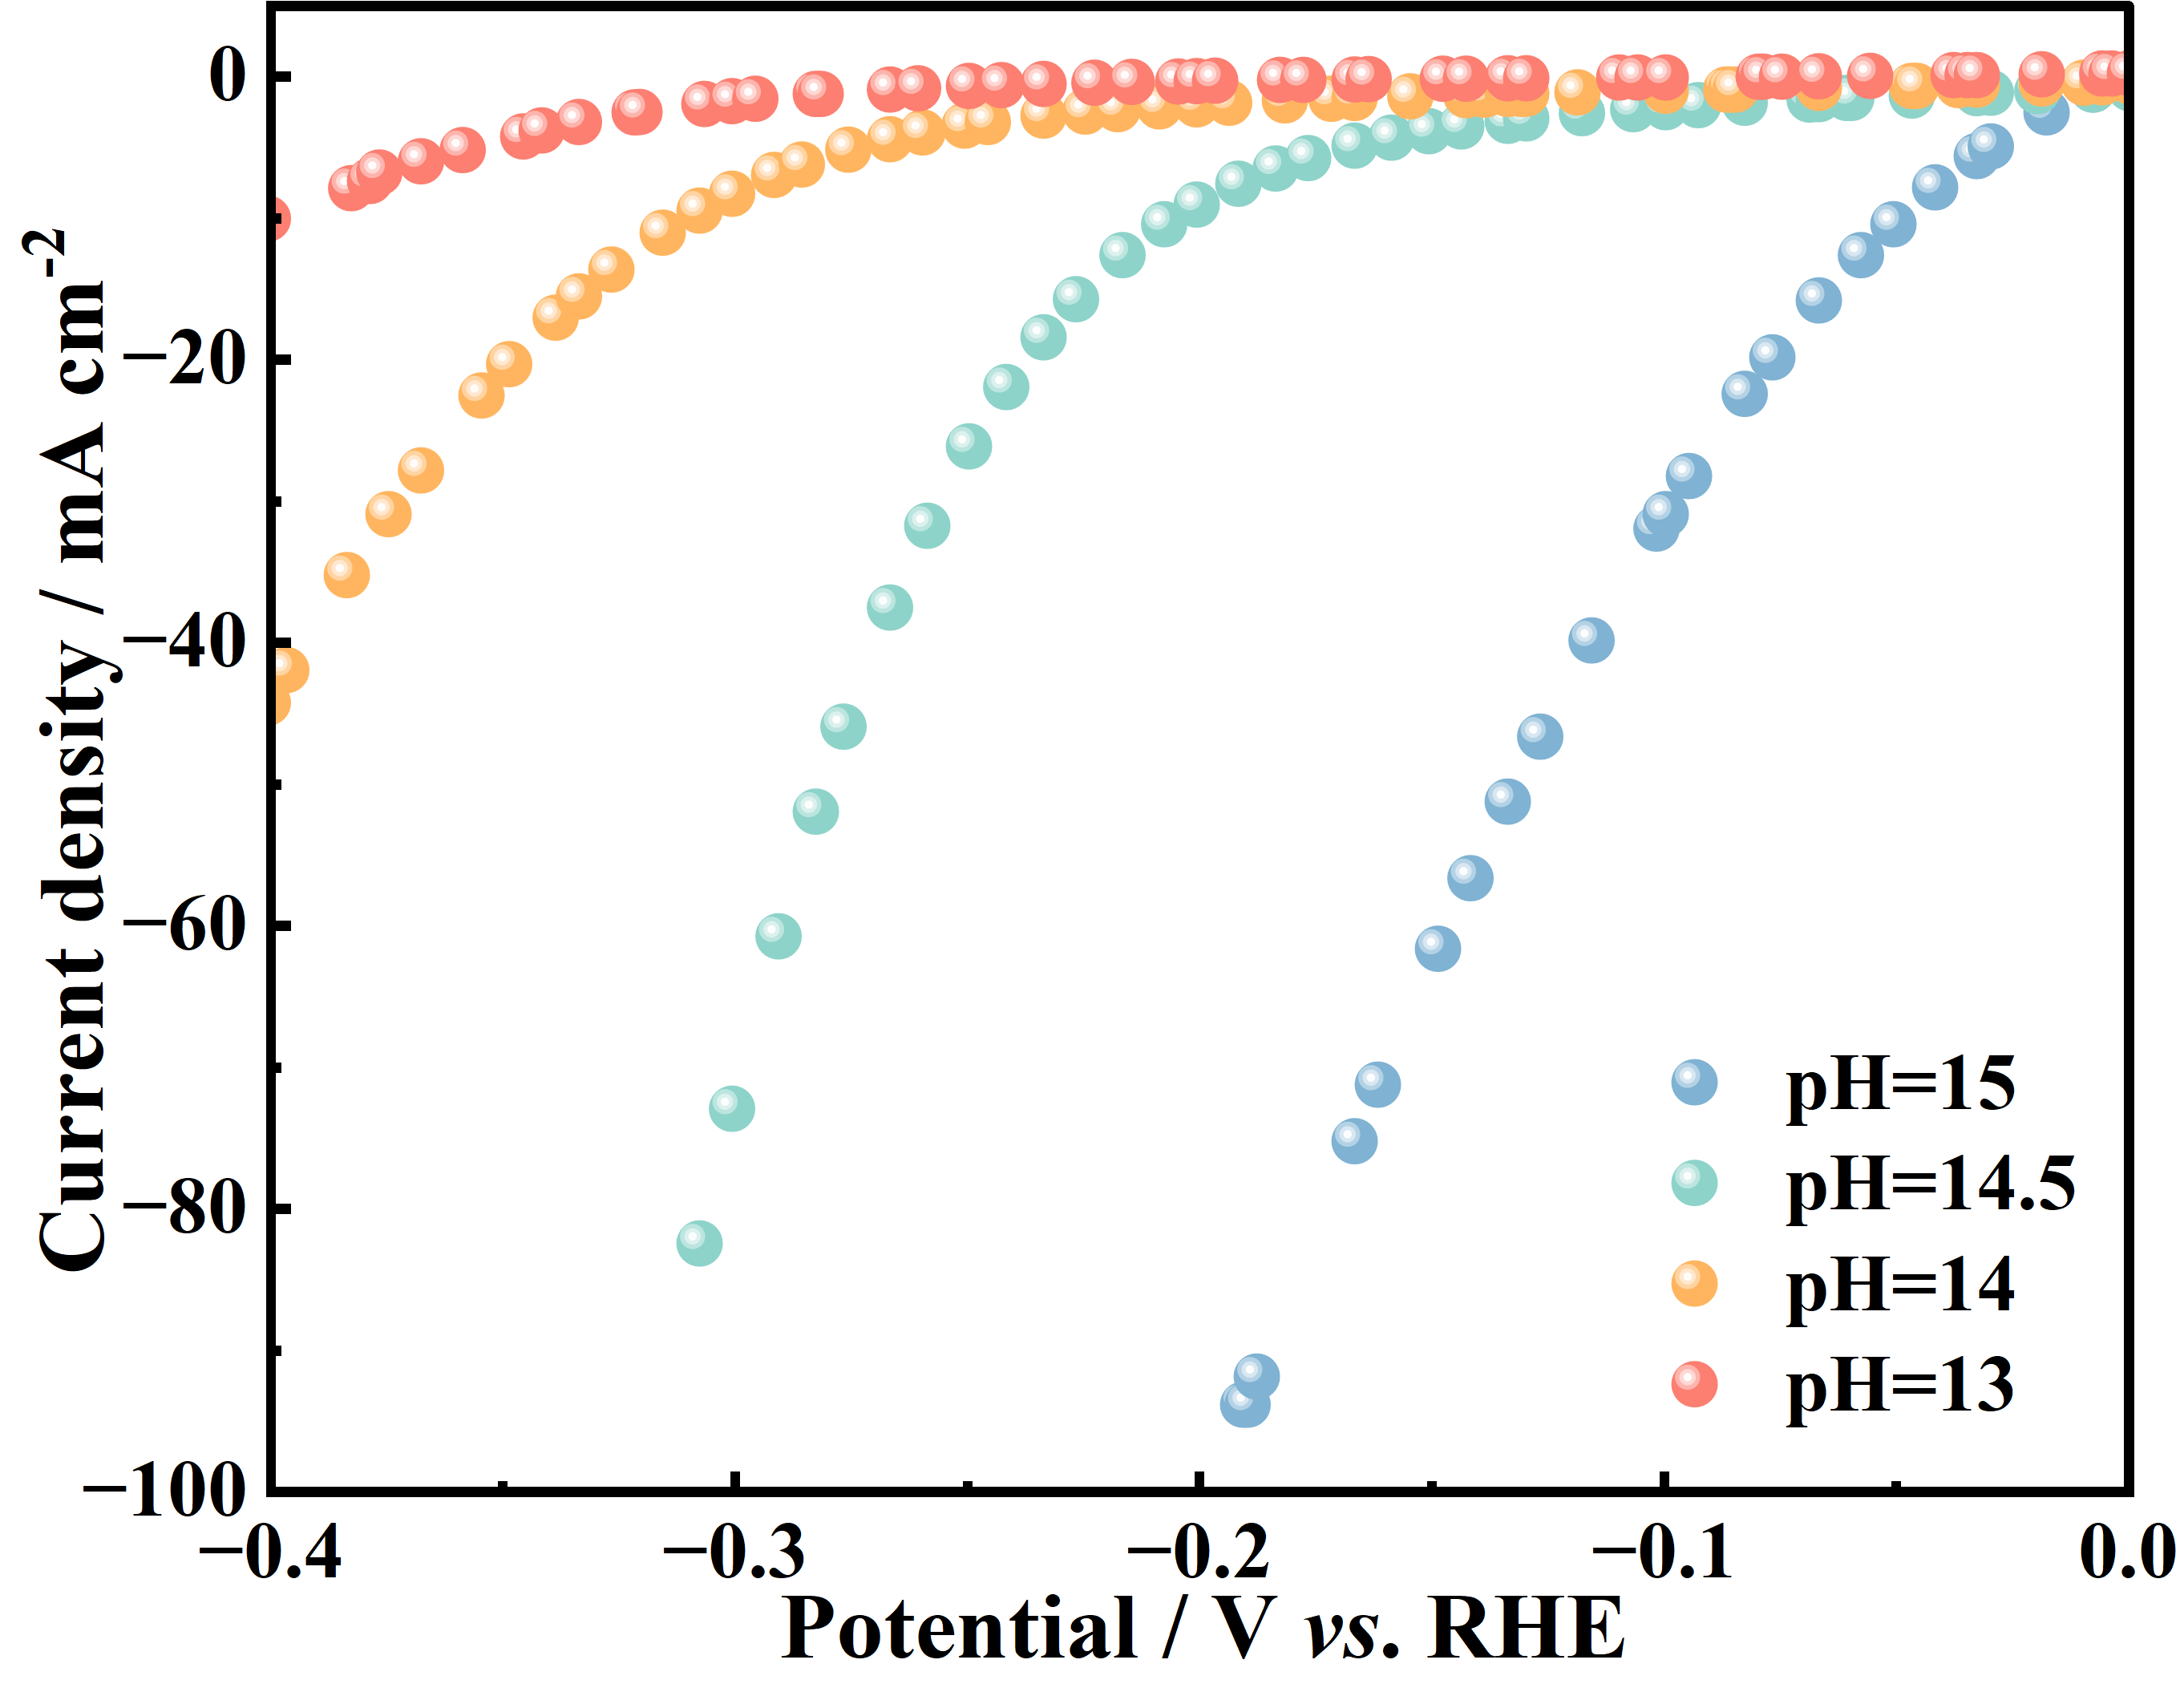

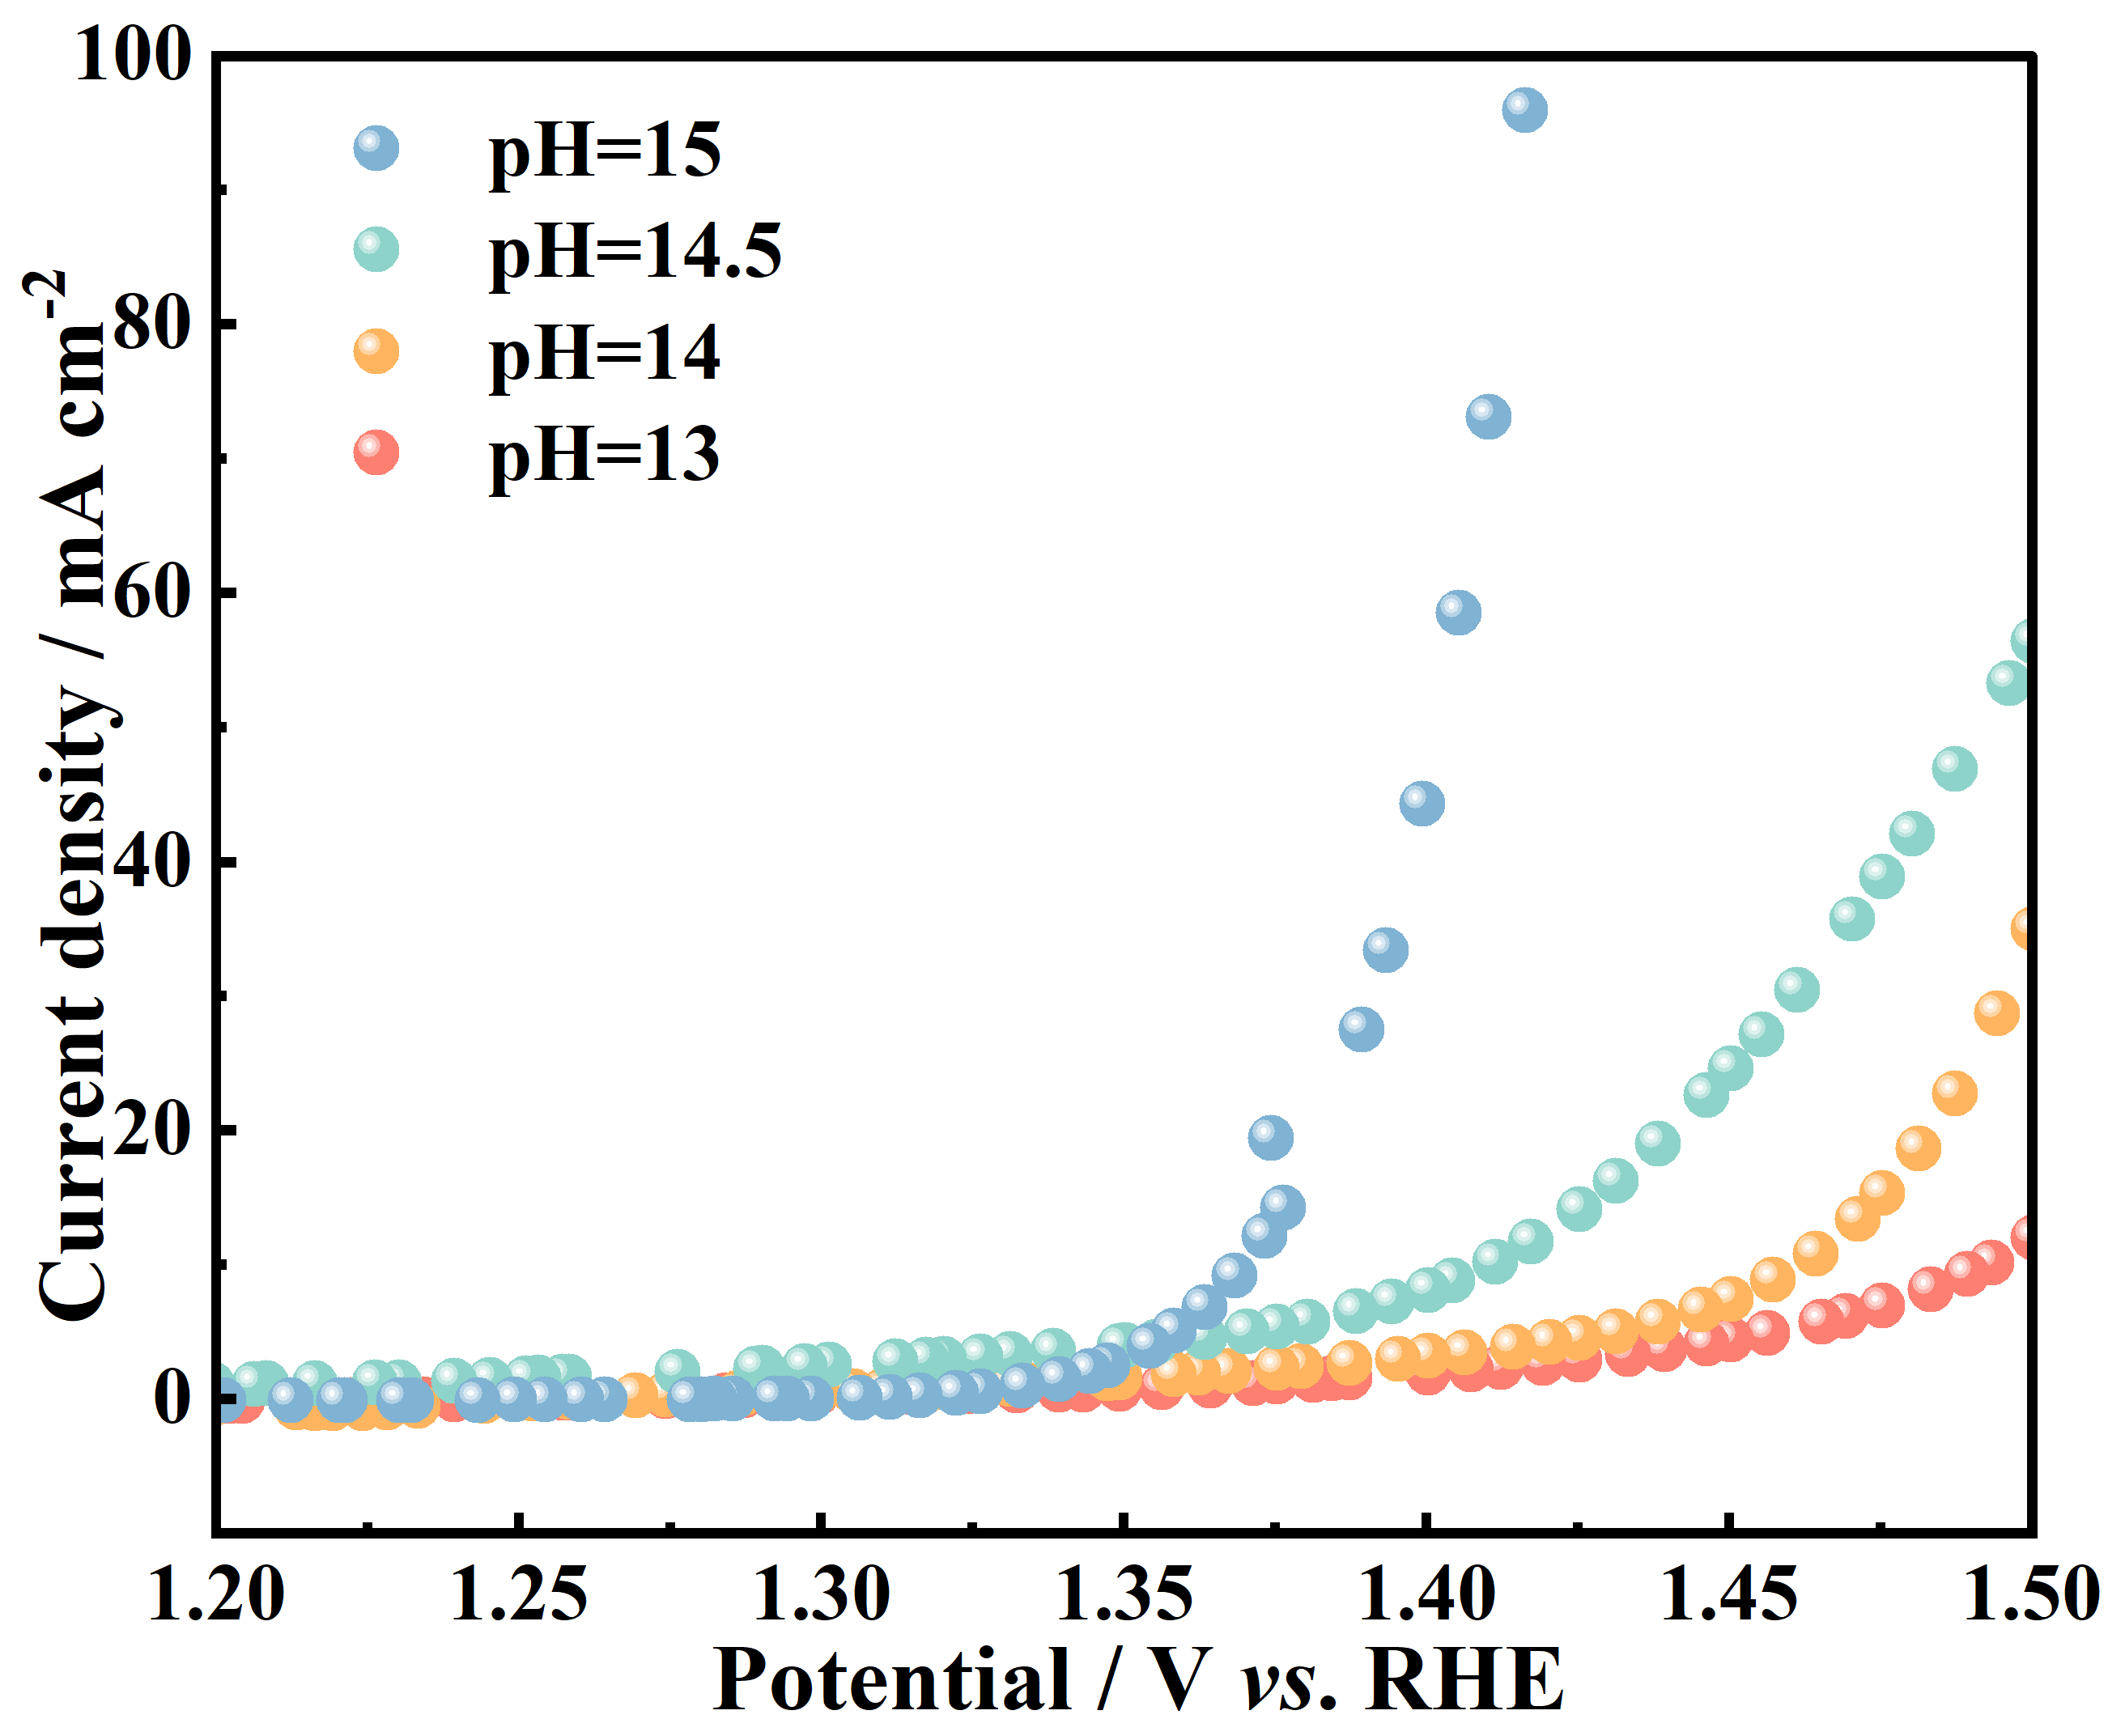

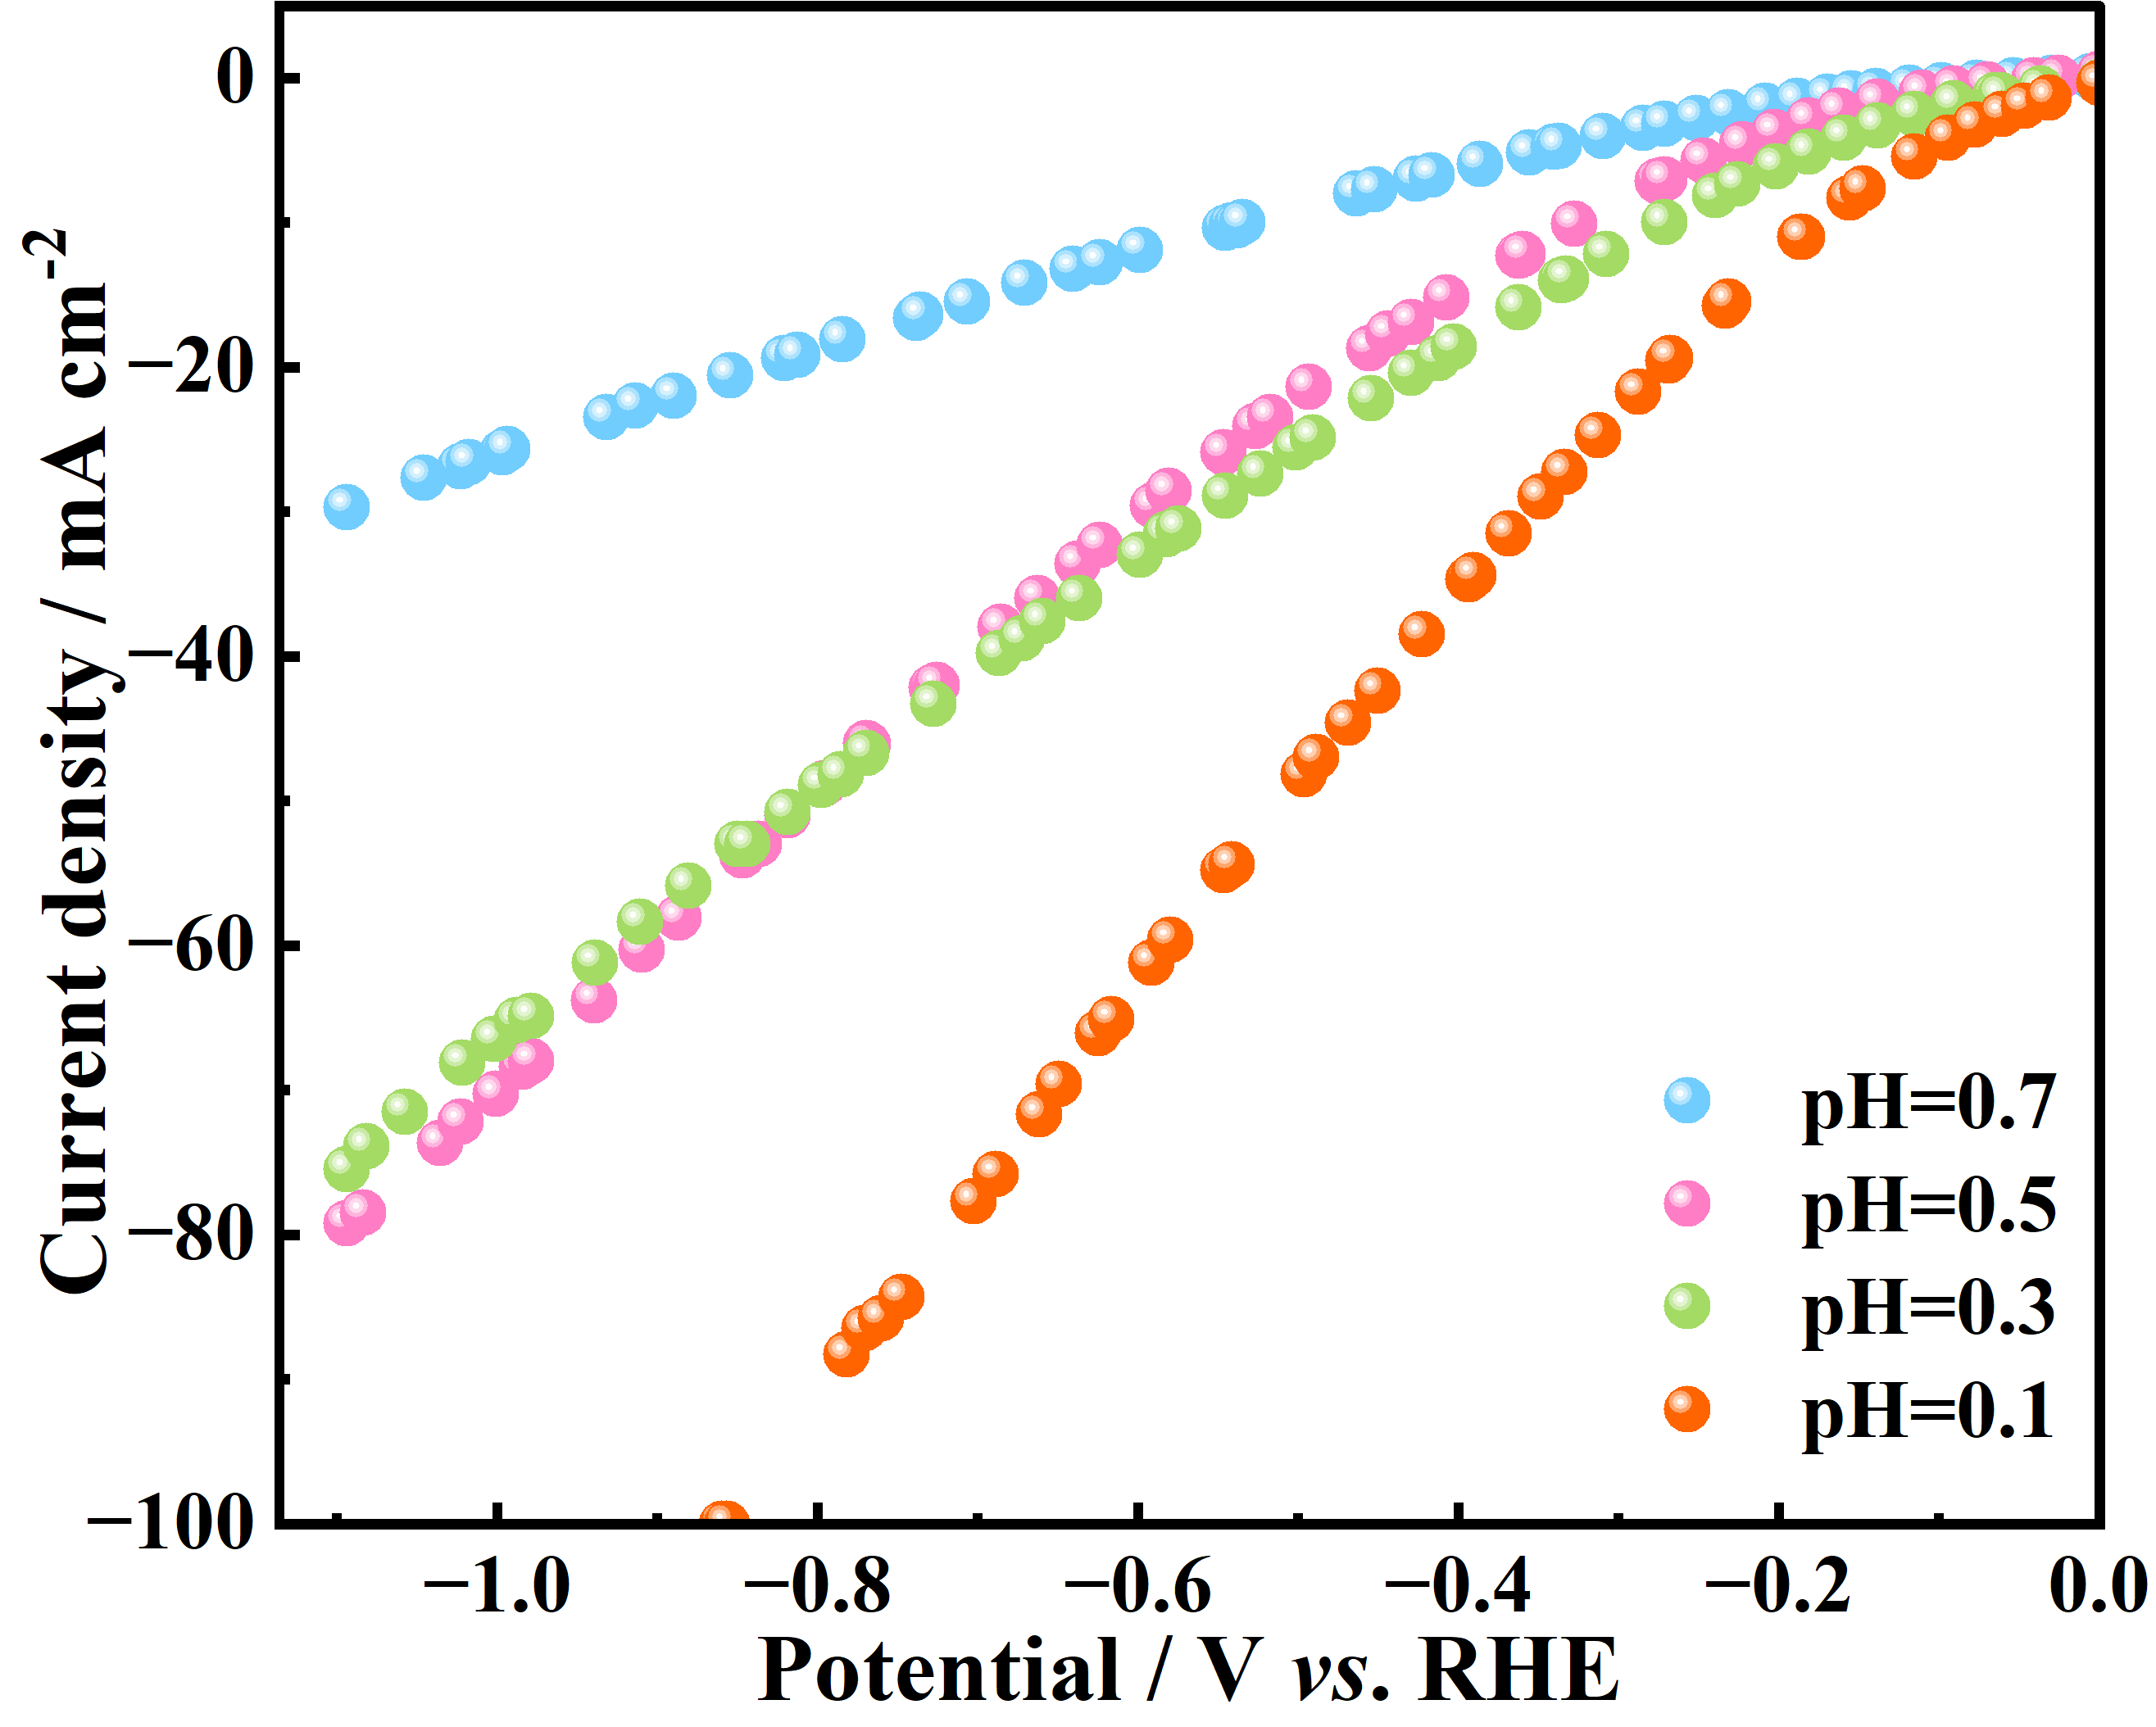


**Figure S3**. LSV curves of Mn-CoP@Ni2P for (a) HER and (b) OER measured in KOH solutions (pH ≈ 13.0, 14.0, 14.5, and ~15.0)；(c) HER and (d) OER measured in H₂SO₄ solutions (pH ≈ 0.7, 0.5, 0.3, and 0.1).


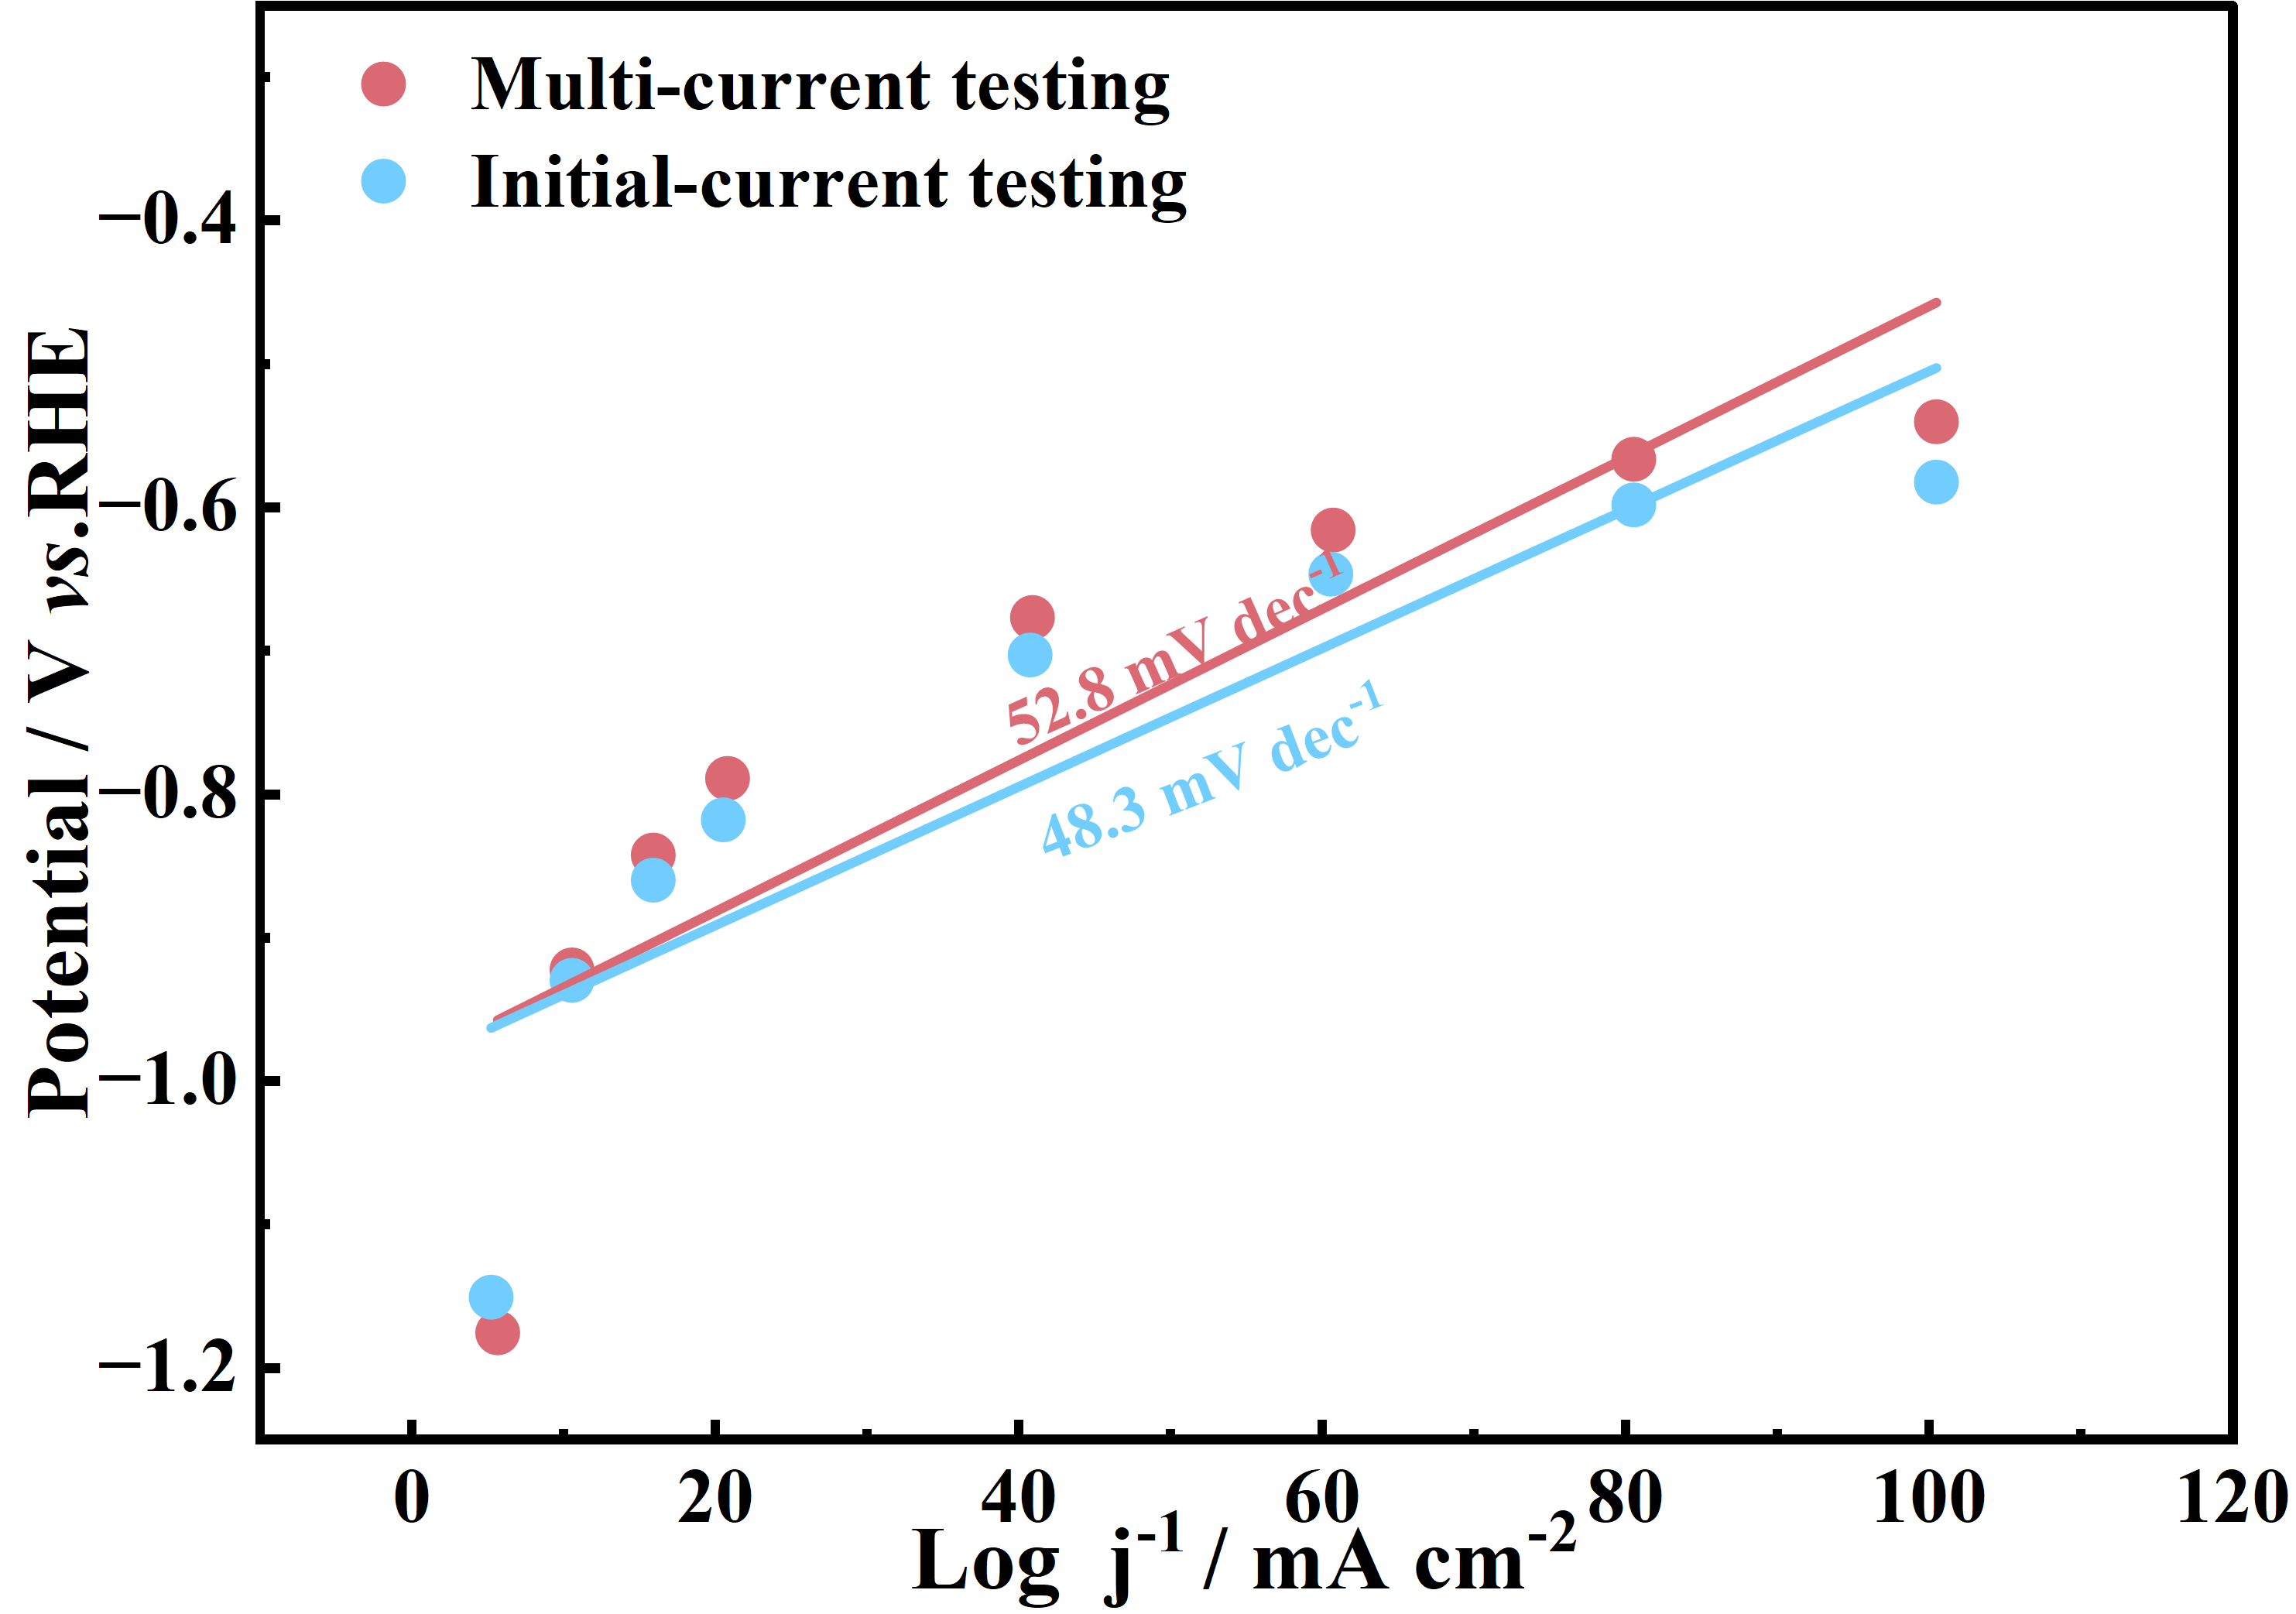

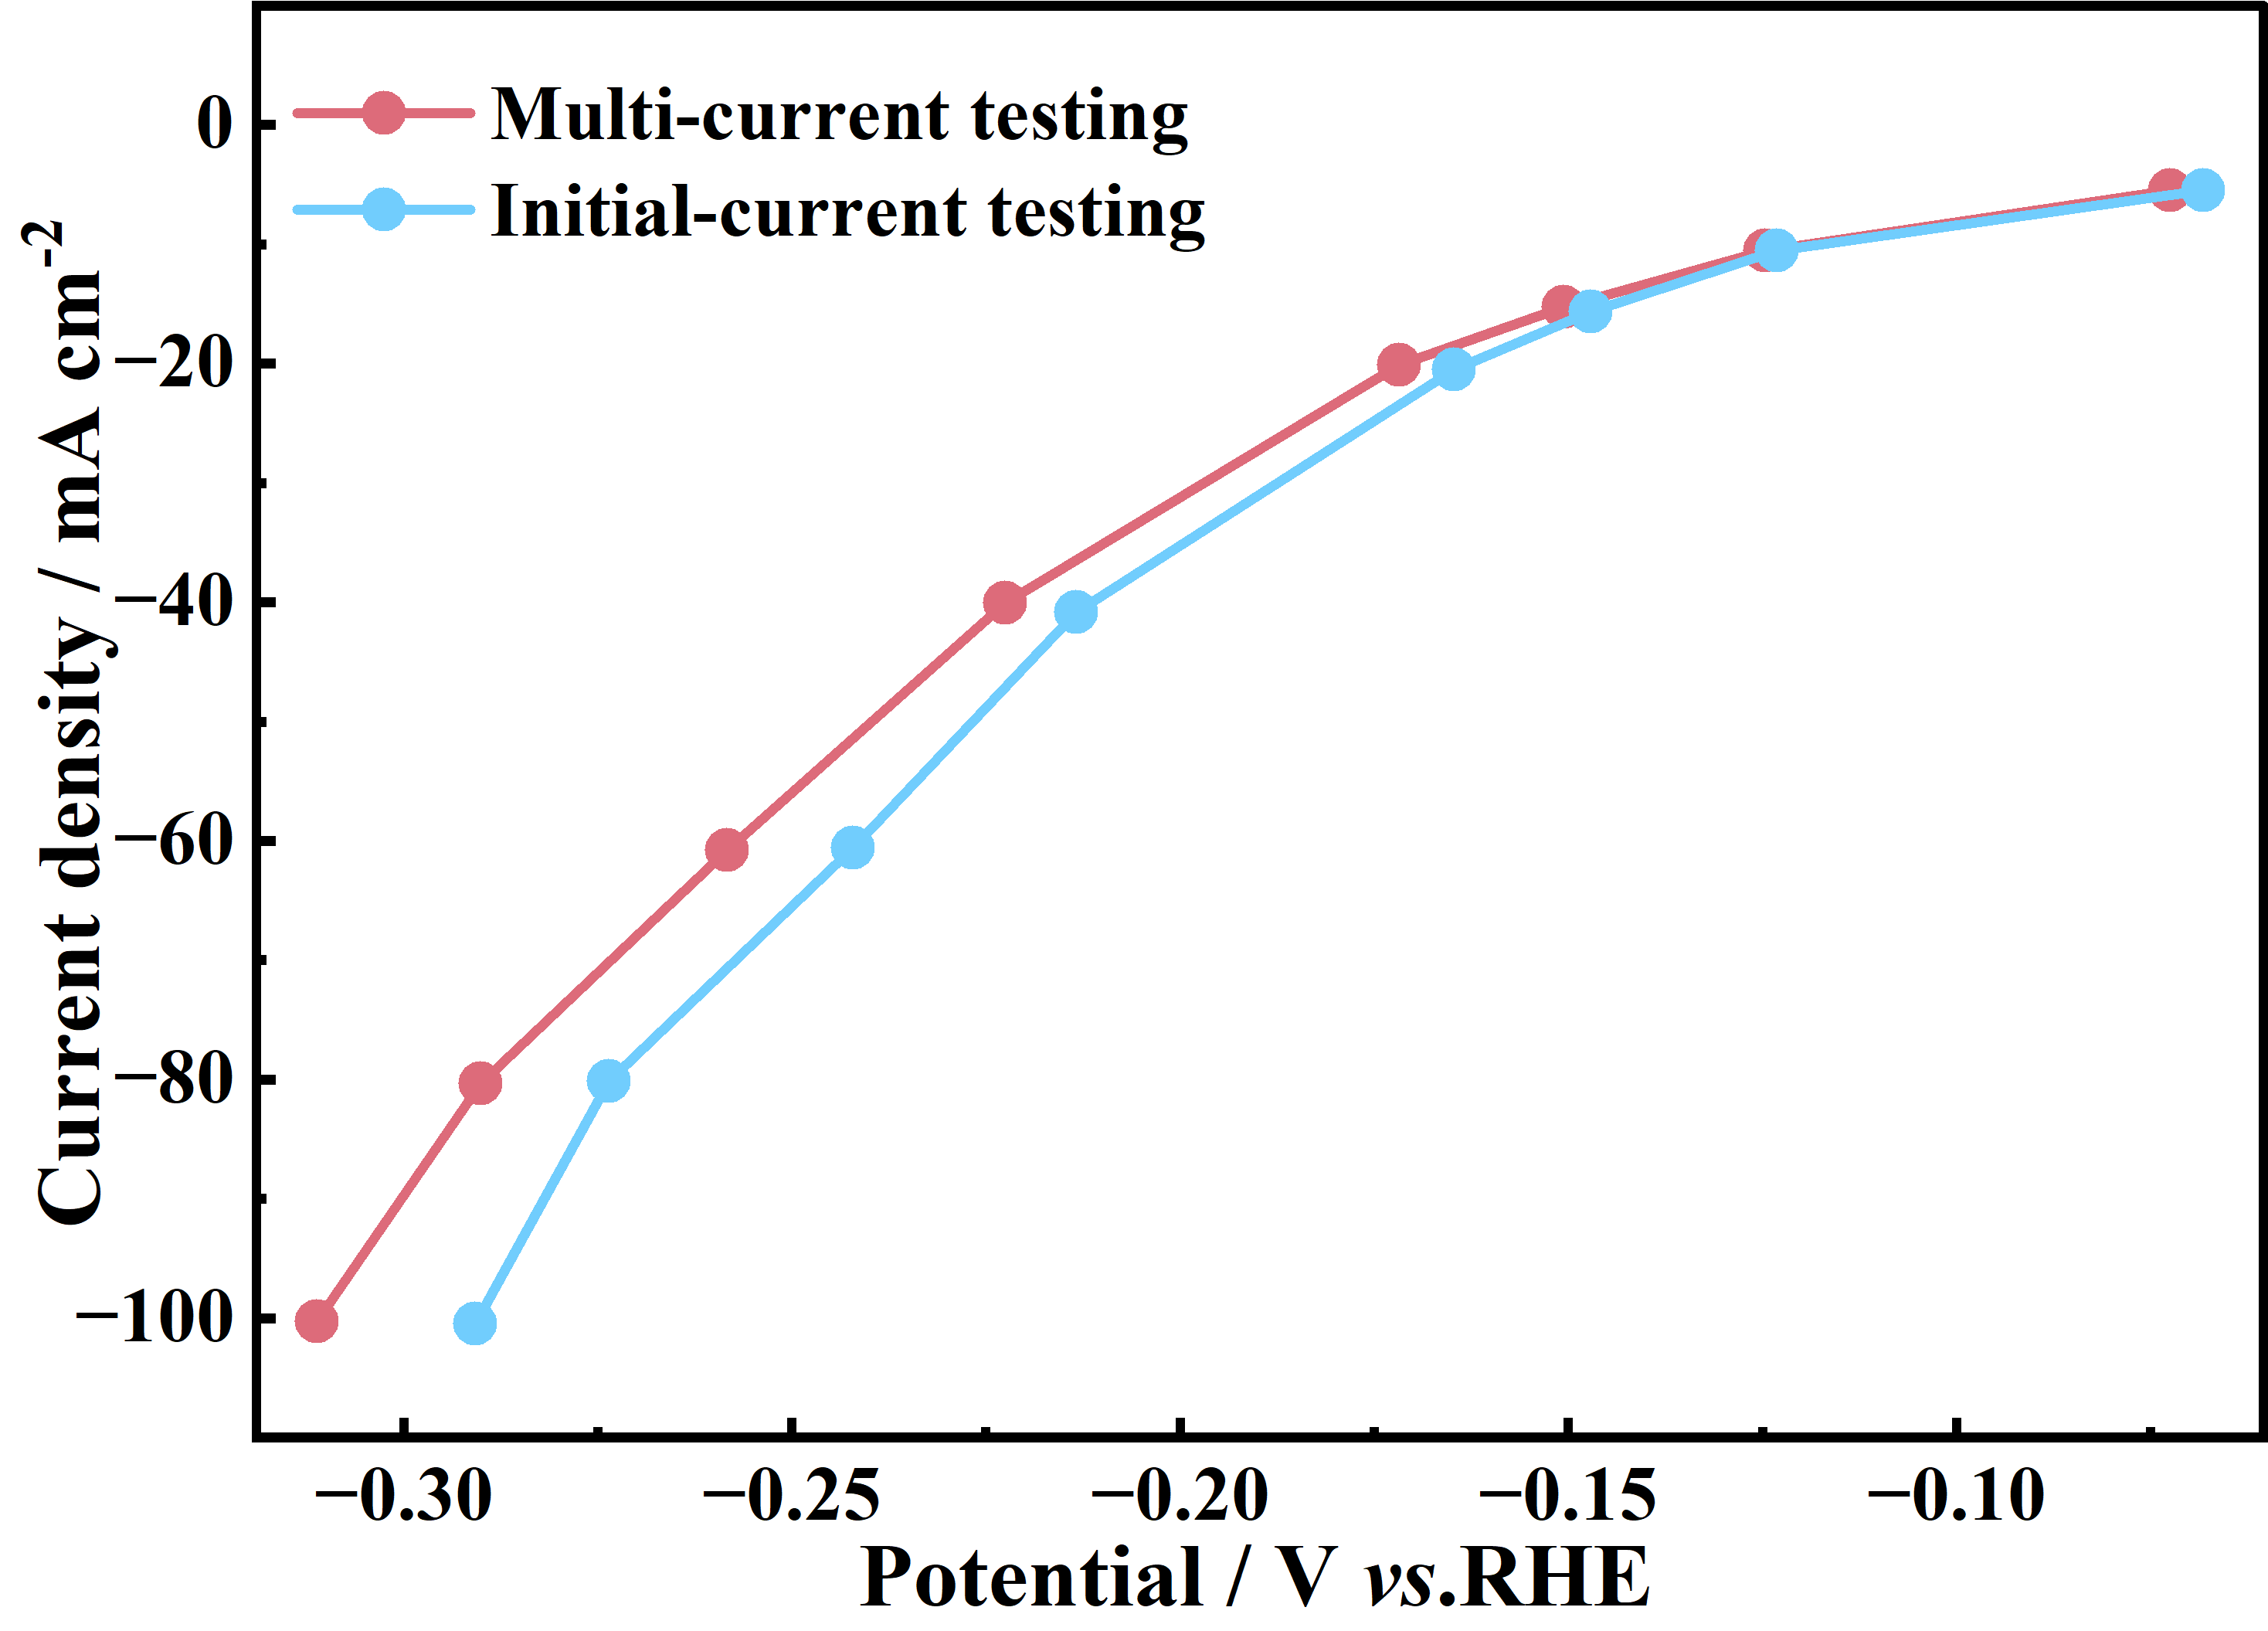


**(a)**

**(b)**

**Figure S4**. Comparison of polarization curves and corresponding Tafel plots obtained from LSV and steady-state potentiostatic measurements for Mn-CoP@Ni2P/NF of HER.

**(a)**


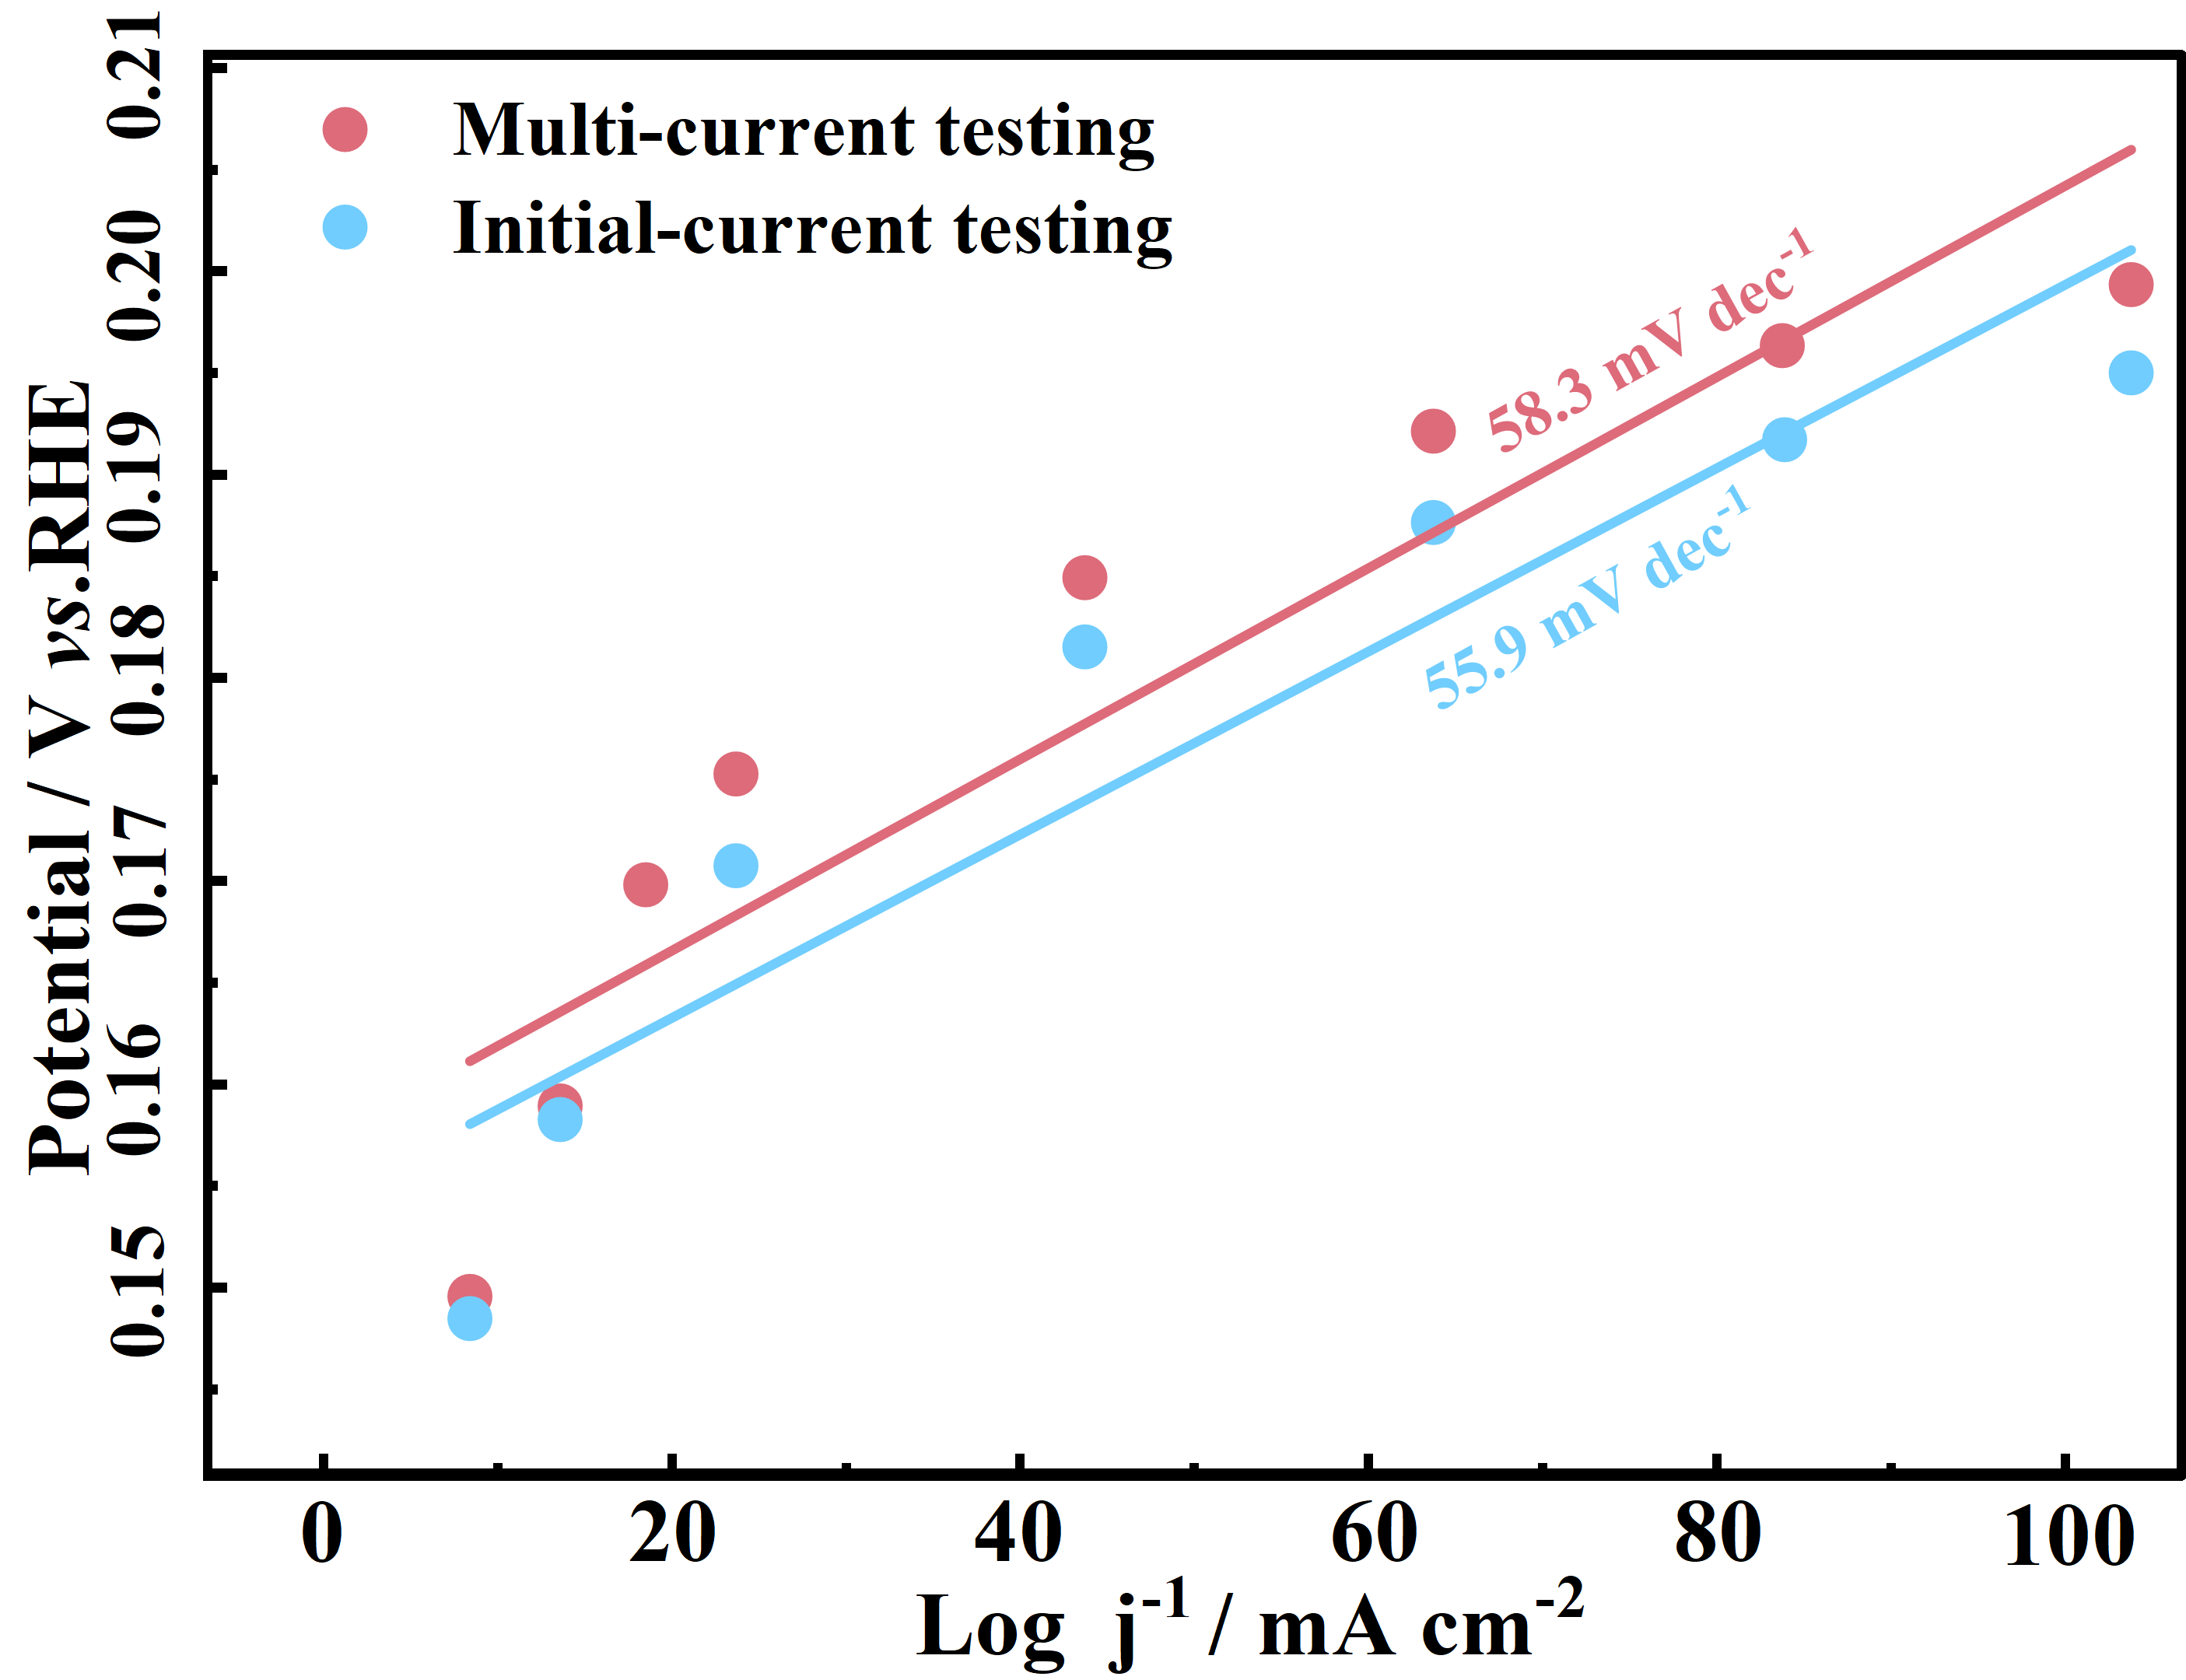

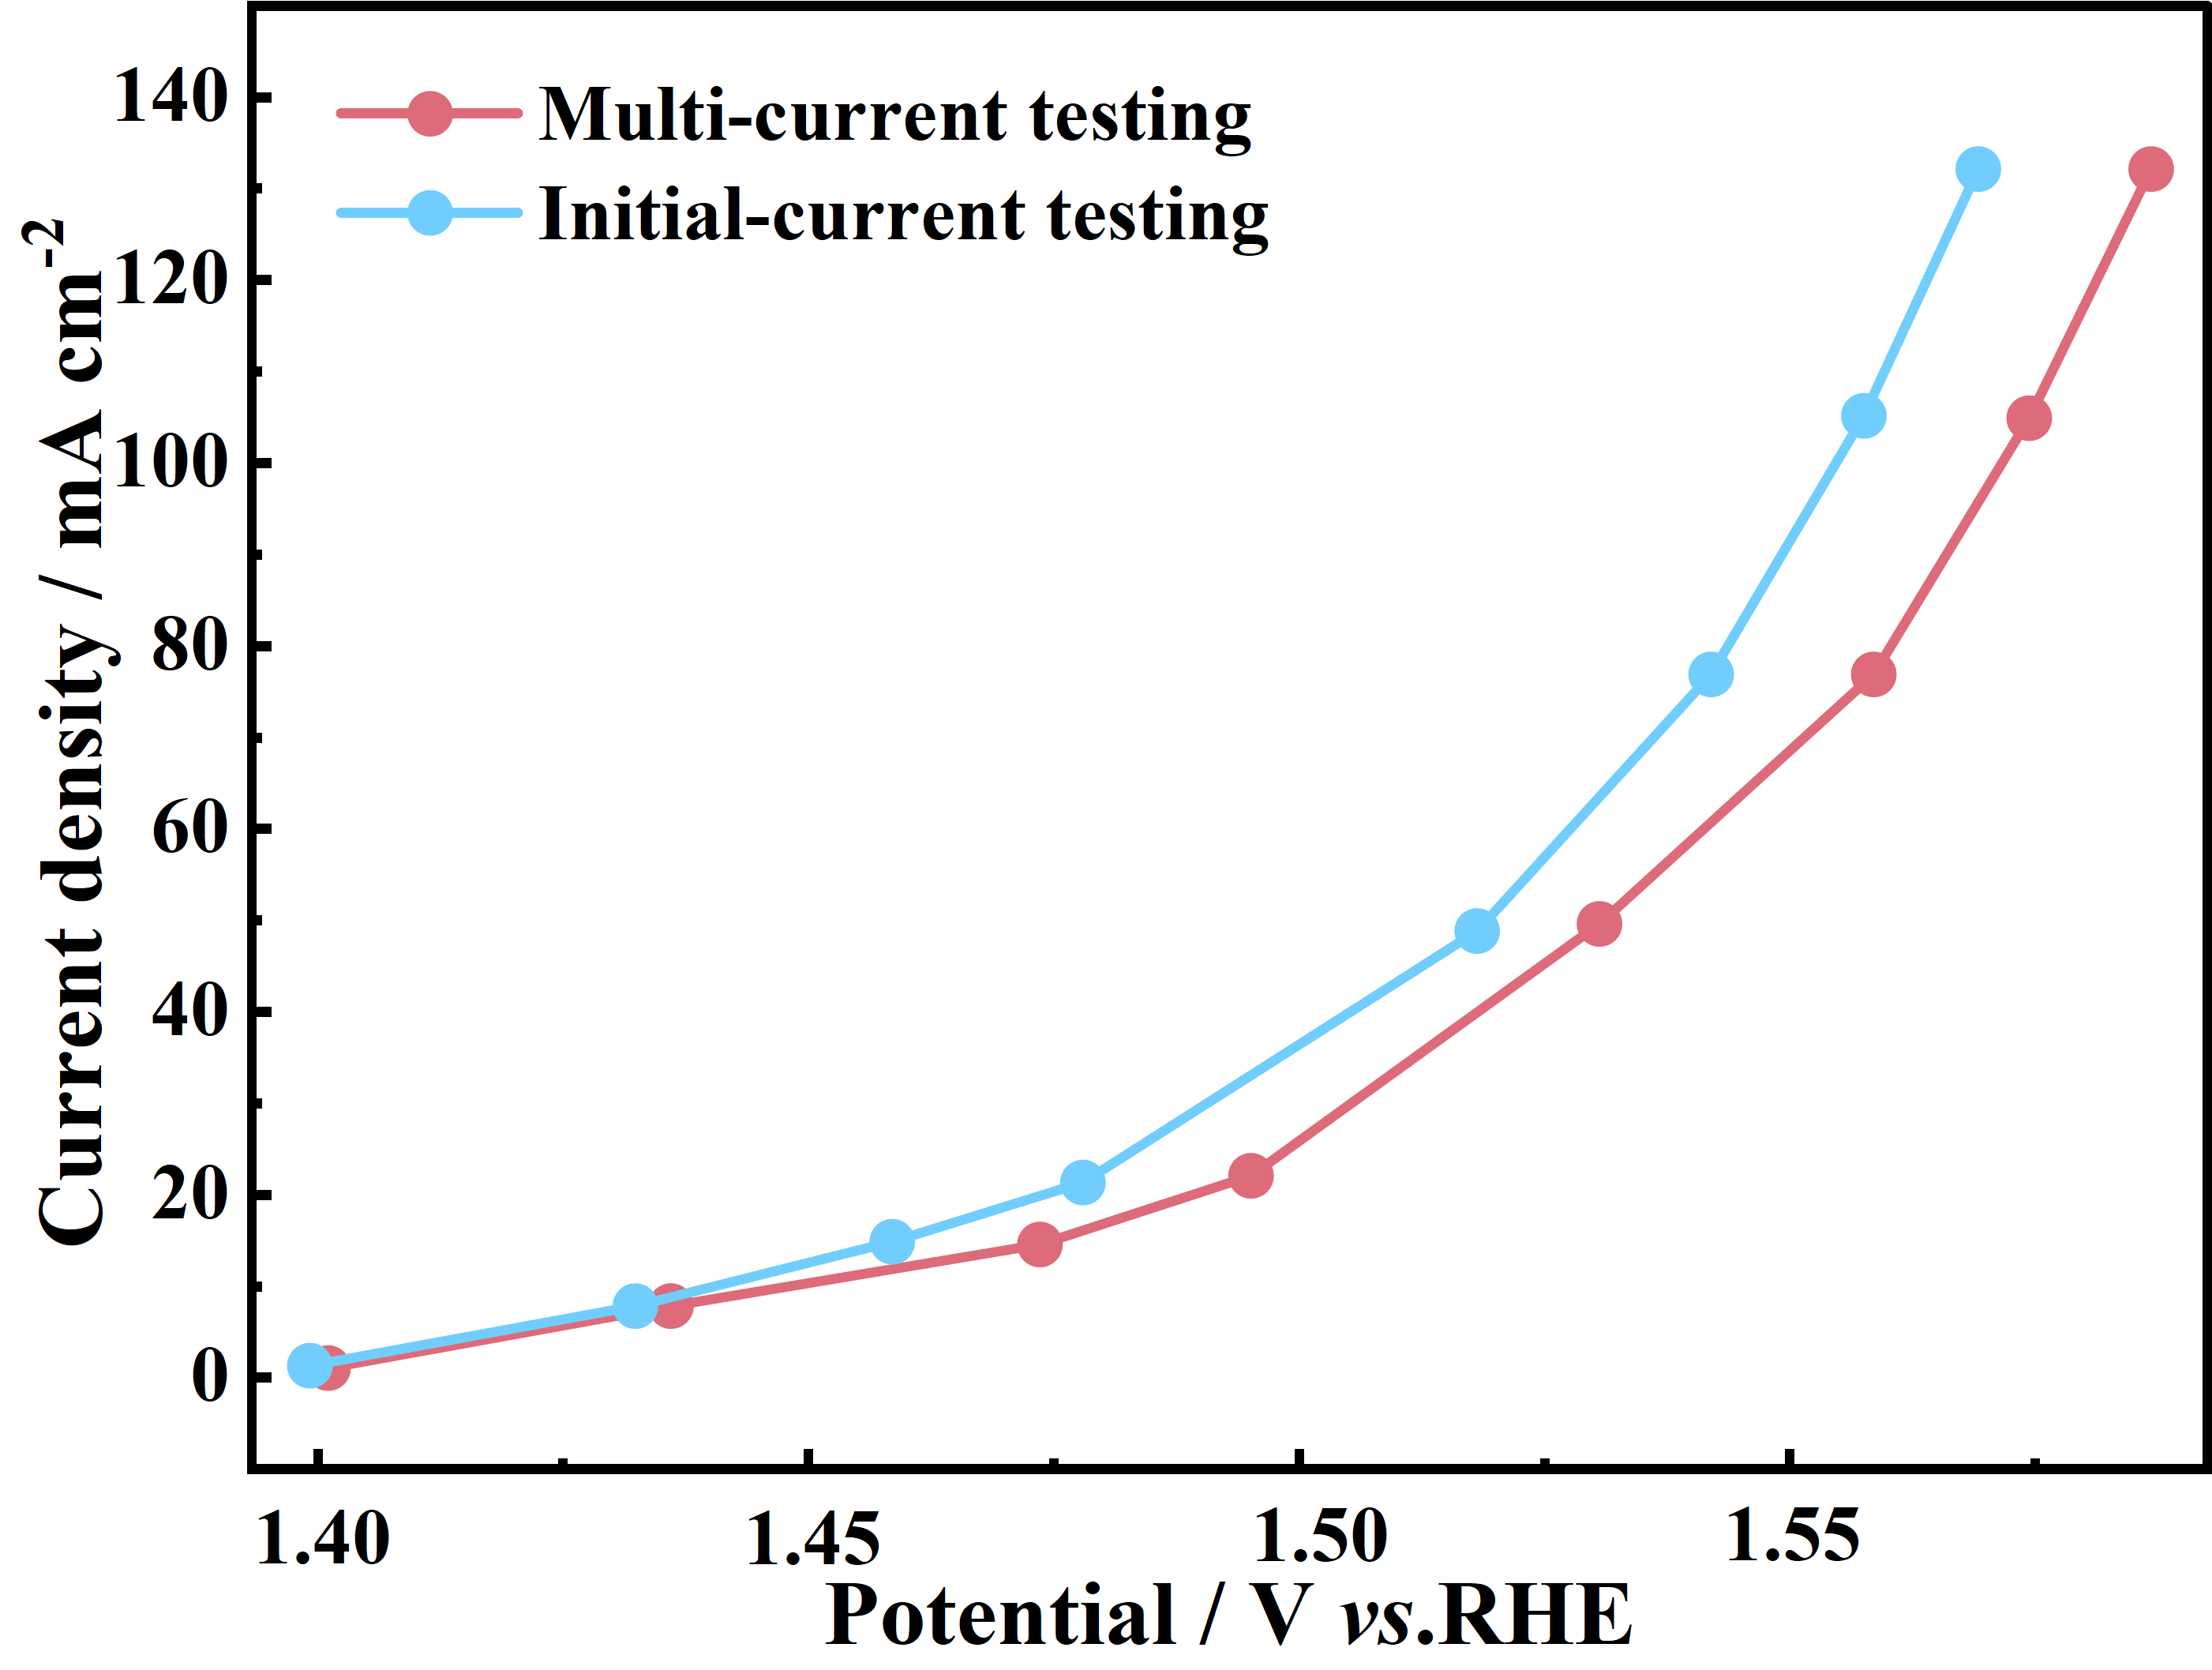


**(b)**

**Figure S5**. Comparison of polarization curves and corresponding Tafel plots obtained from LSV and steady-state potentiostatic measurements for Mn-CoP@Ni2P/NF of

OER.

**Table S1.** Comparison of HER performance in 1 M KOH (pH = 14) for the Mn-CoP@Ni2P with other similar electrocatalysts.

| **Catalyst** | **Electrolyte** | **η (mV) @ 10 mA cm-2** | **Tafel slope (mV dec-1)** | **Reference** |
| --- | --- | --- | --- | --- |
| CoMoP@C | 1 M KOH | 81 | 55.53 | 46 |
| CoPx/N-rGO | 1 M KOH | 104 | 65 | 47 |
| NiP2 | 1 M KOH | 102 | 65 | 48 |
| Cu0.3Co2.7P/Nitrogen doped carbon | 1 M KOH | 220 | 122 | 49 |
| CoP@CoOOH/CP | 1 M KOH | 81.7 | 50.7 | 50 |
| Ni2P/Fe2P | 1 M KOH | 121 | 67 | 51 |
| Ni–P/Ni2P/CC-2 | 1 M KOH | 95 | 80.4 | 52 |
| CoP@NiCo LDH-100 | 1 M KOH | 62 | 74.03 | 53 |
| **Mn-CoP@Ni2P** | **1 M KOH** | **61.7** | **40** | **This work** |

**Table S2.** Comparison of OER performance in 1 M KOH (pH = 14) for the Mn-CoP@Ni2P with other similar electrocatalysts.

| **Catalyst** | **Electrolyte** | **η (mV) @ 10 mA cm-2** | **Tafel slope (mV dec-1)** | **Reference** |
| --- | --- | --- | --- | --- |
| Co2P/CoP@NPGC-1 | 1 M KOH | 340 | 116 | 54 |
| Ni-NCN/CoFe-LDH | 1 M KOH | 280 | 42.83 | 55 |
| n-Co2P | 1 M KOH | 370 | 134 | 56 |
| NiCo@NC-900 | 1 M KOH | 390 | 143.7 | 57 |
| Co-NiP@NC | 1 M KOH | 280 | 52 | 58 |
| CoFeP@C | 1 M KOH | 262 | 44.8 | 59 |
| Ni1-Co1-P | 1 M KOH | 292 | 74 | 60 |
| Ni-Co-P/GDY | 1 M KOH | 290 | 72.7 | 61 |
| **Mn-CoP@Ni2P** | **1 M KOH** | **122** | **64.09** | **This work** |
